# Supplementary material for: Histone demethylase KDM7A regulates bone homeostasis through balancing osteoblast and osteoclast differentiation
Source: PubMed Central journal article supplement (PMC10861515; doi:10.1038/s41419-024-06521-z), 2024-02-12

Figure 1B

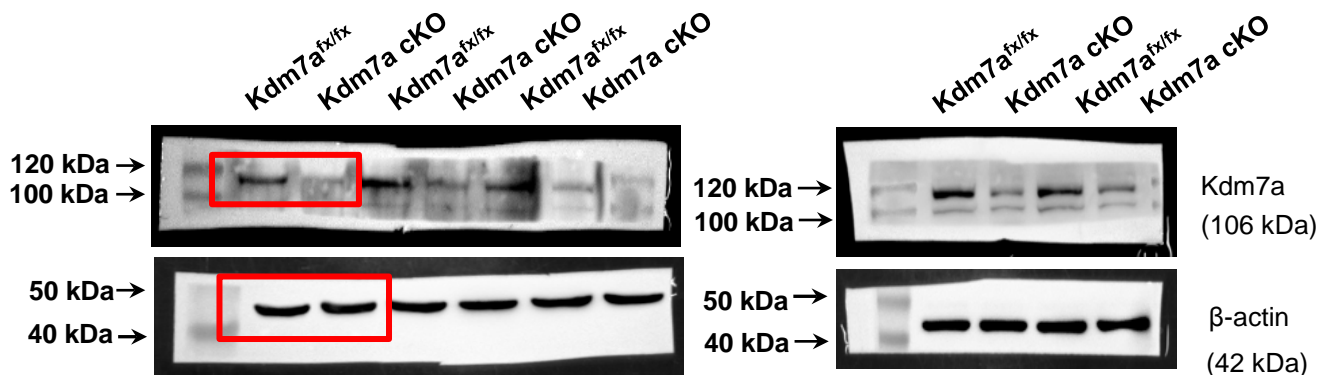

Figure 1C

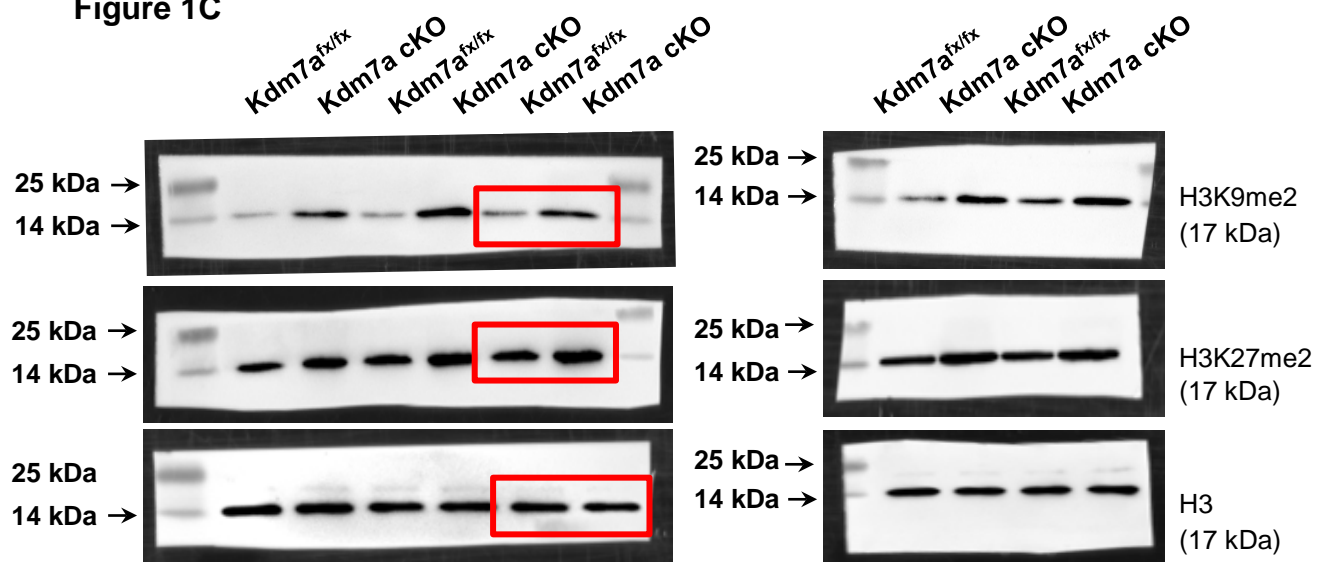

Figure 4C

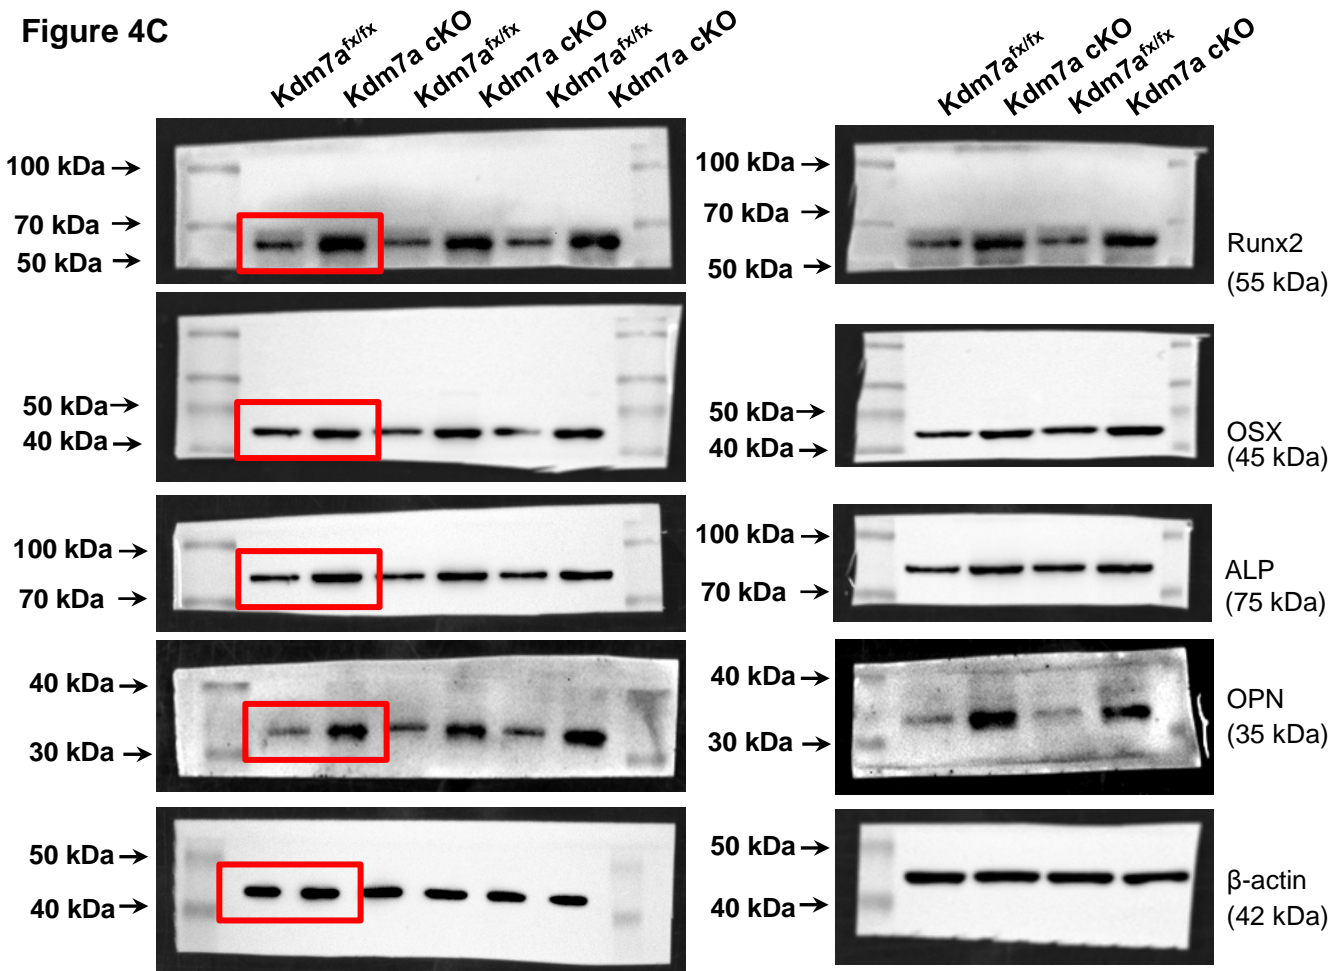

Figure 4G

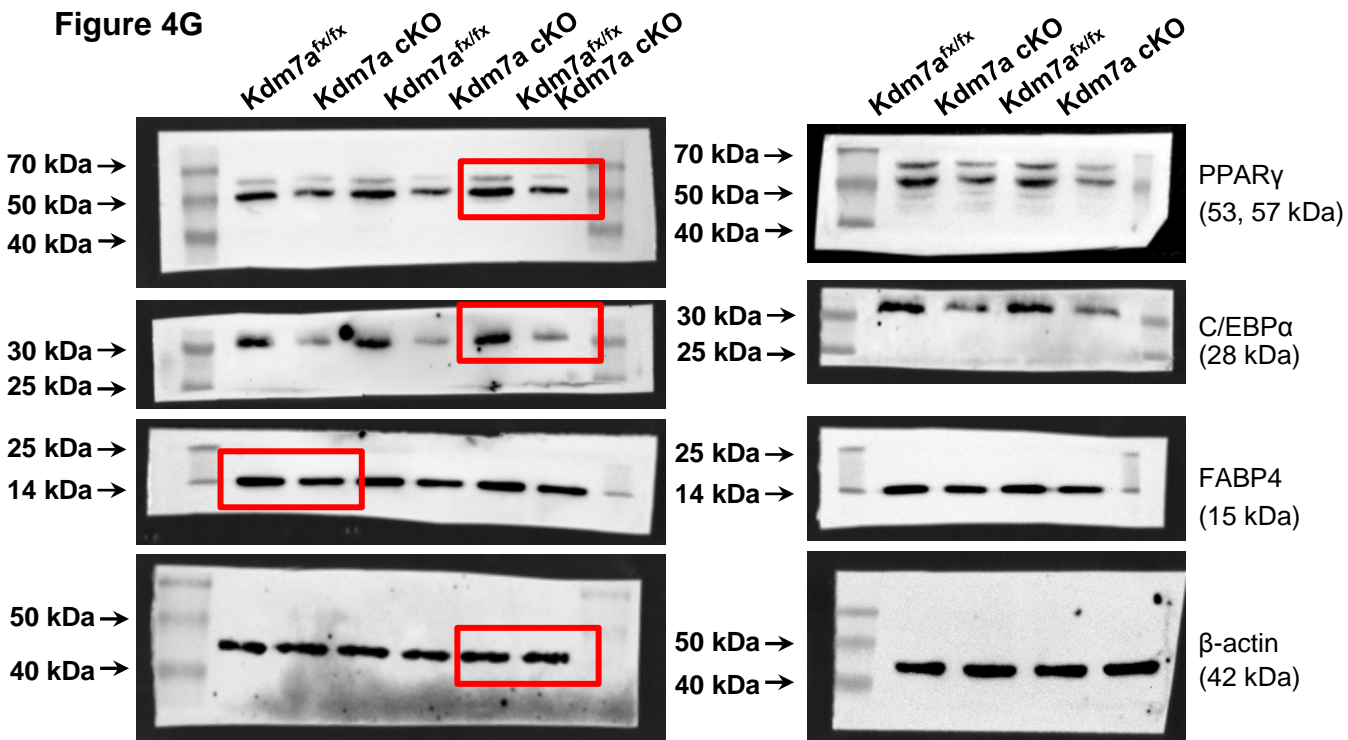

Figure 5D

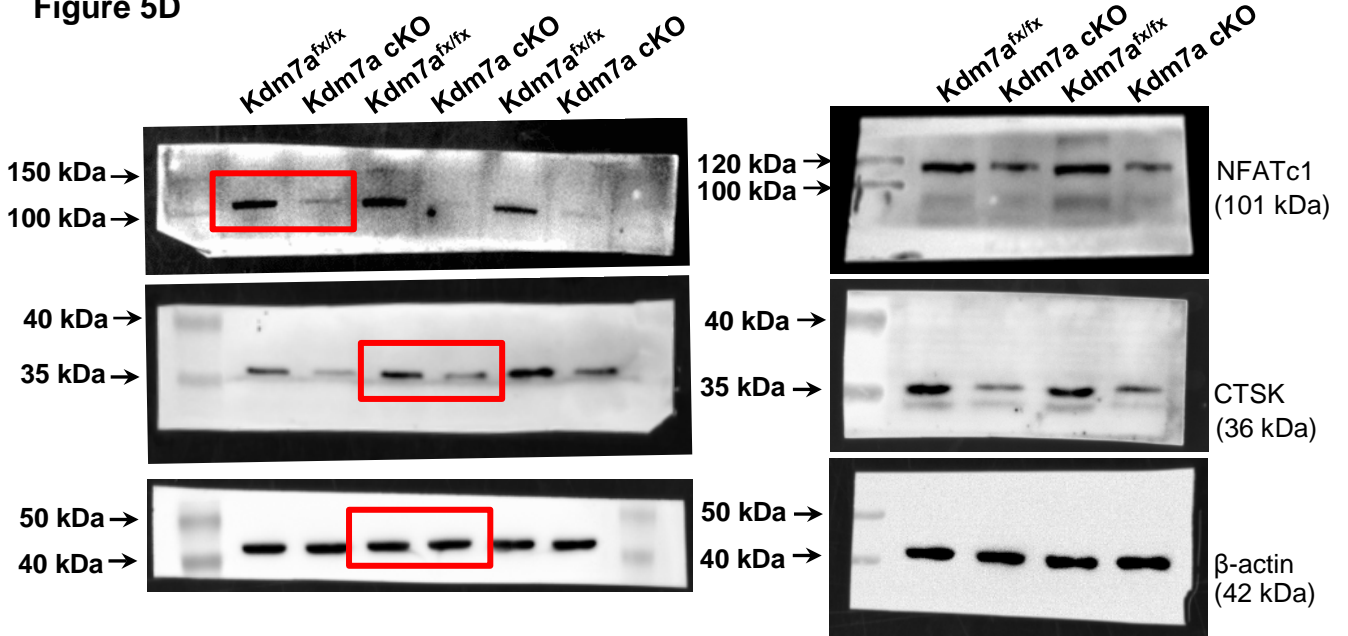

Figure 5H

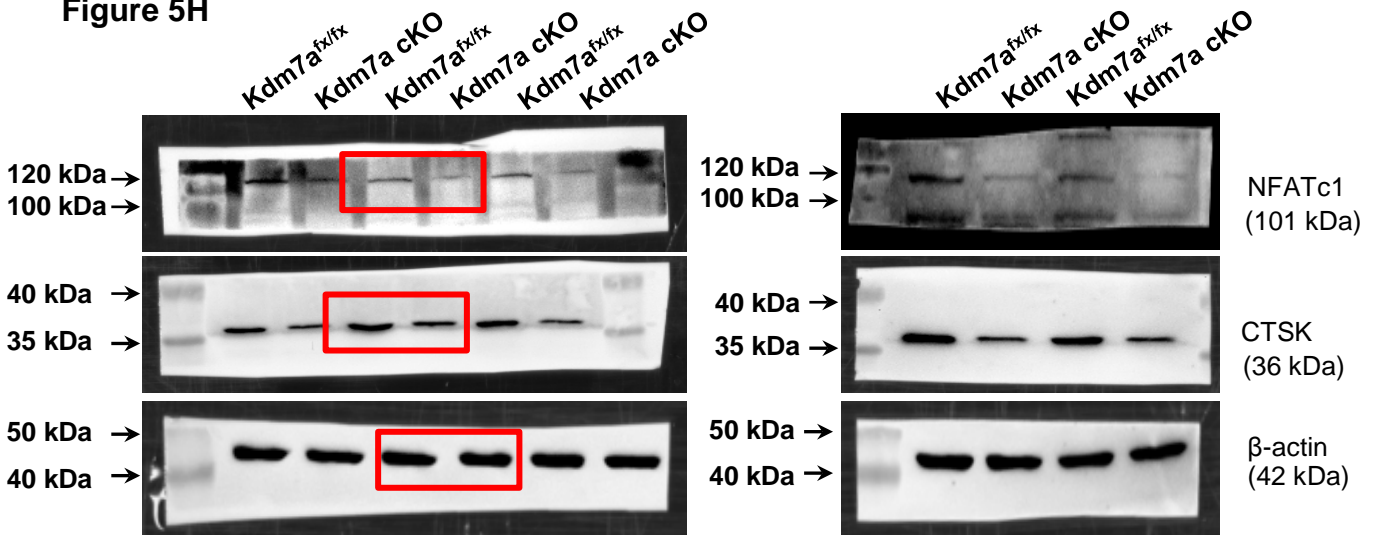

Figure 5L

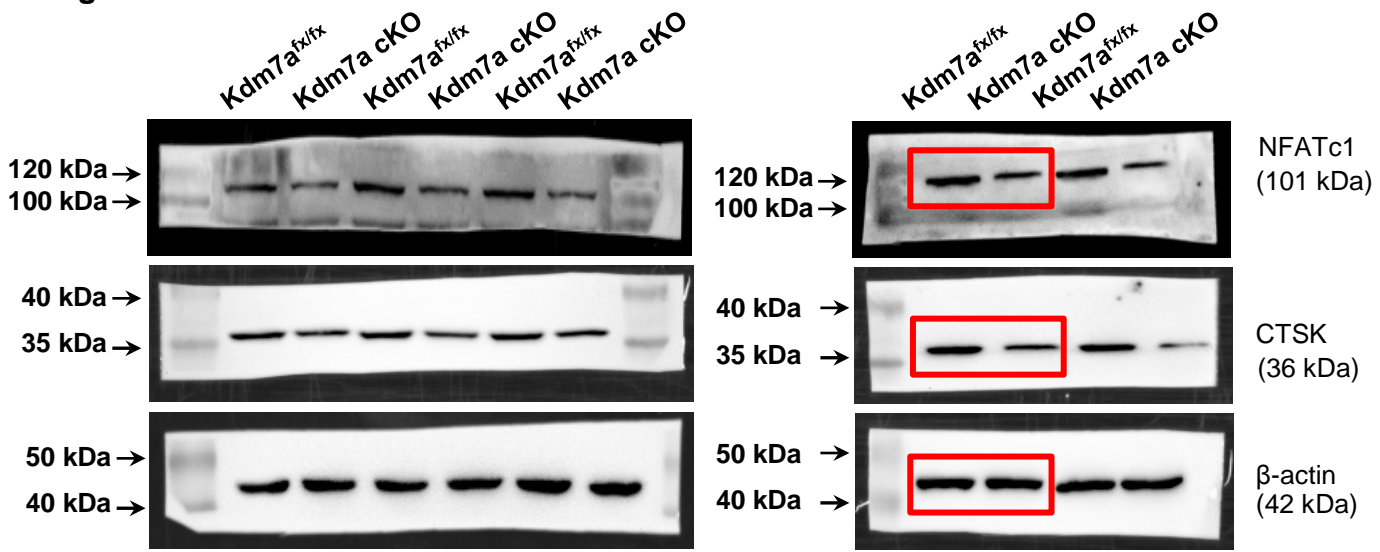

Figure 6B

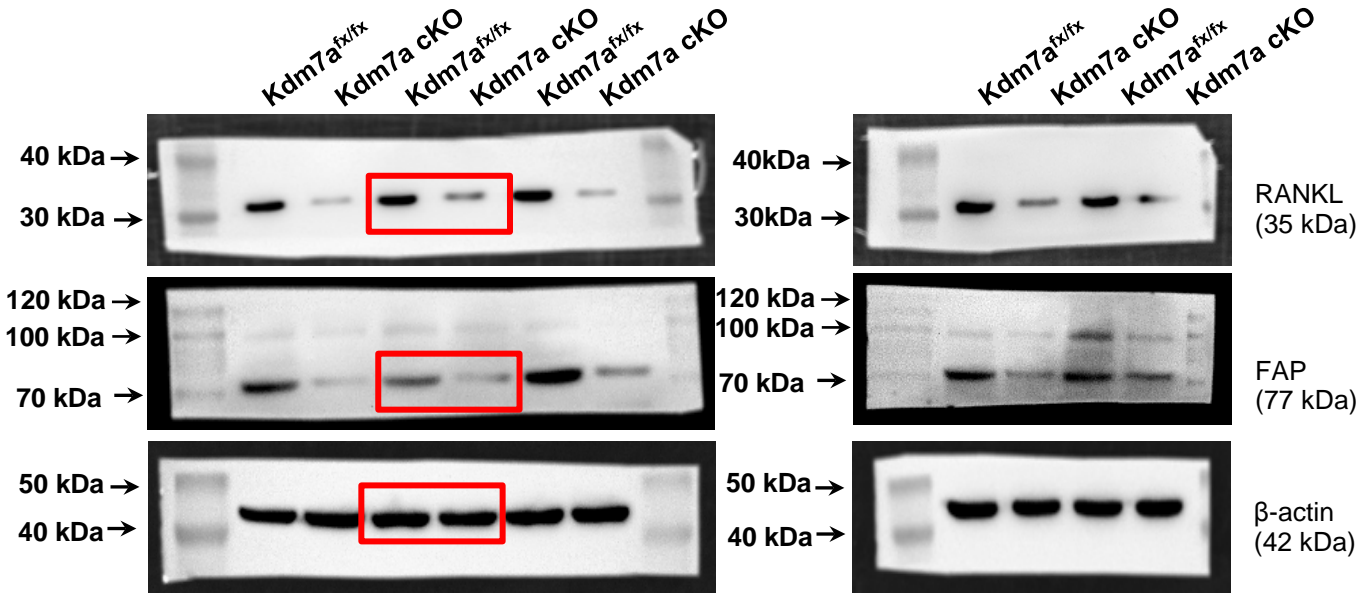

Figure 7G

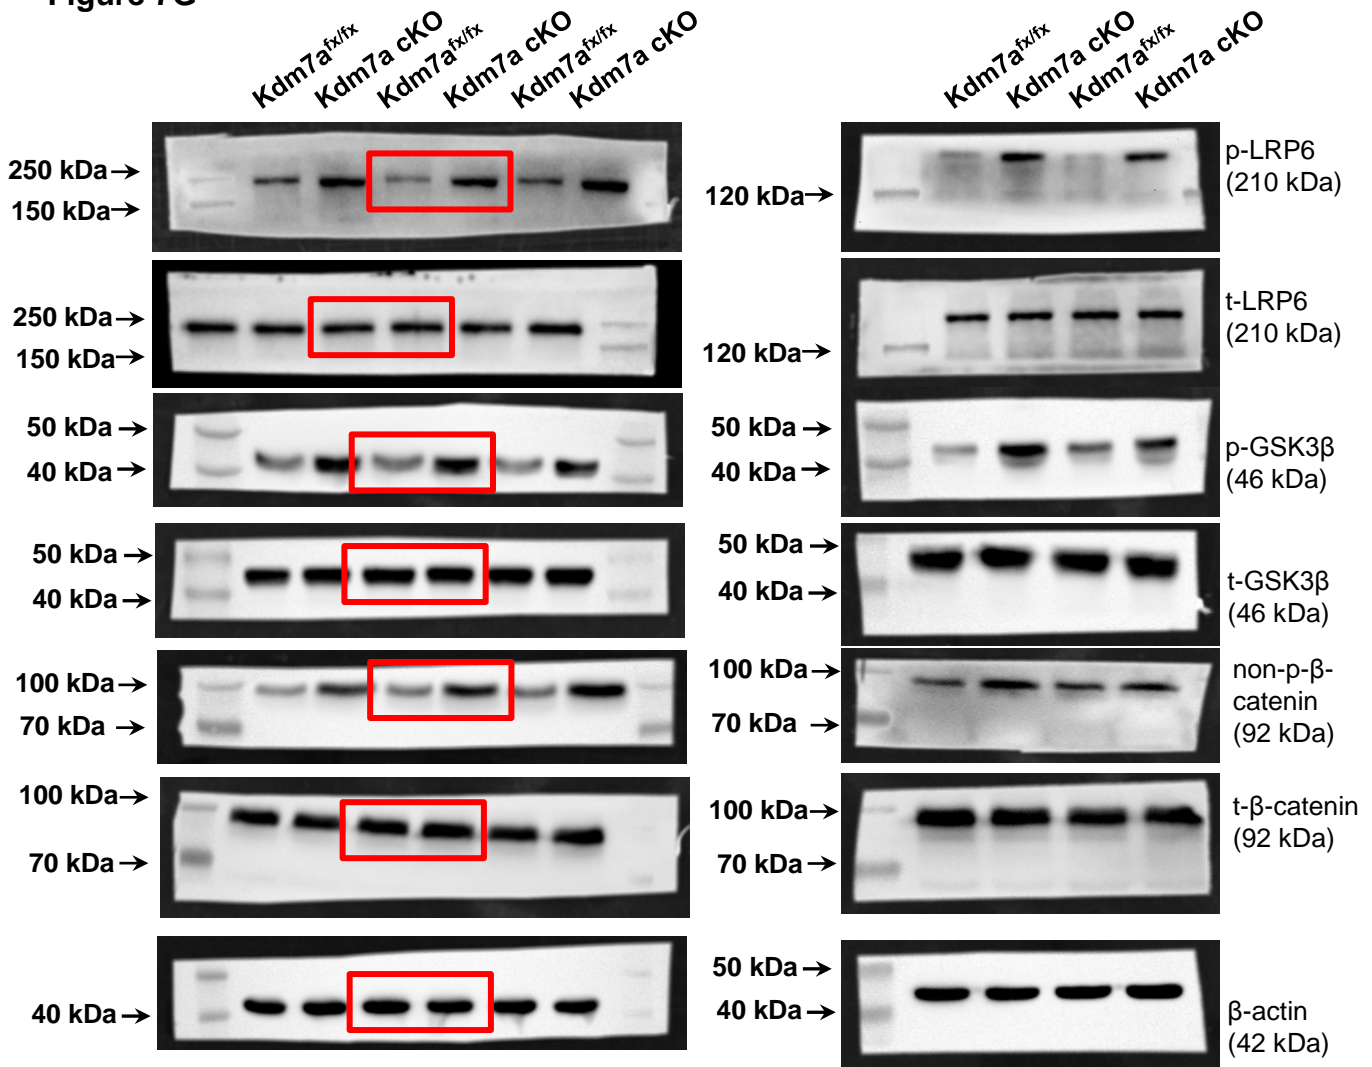

Figure 8C

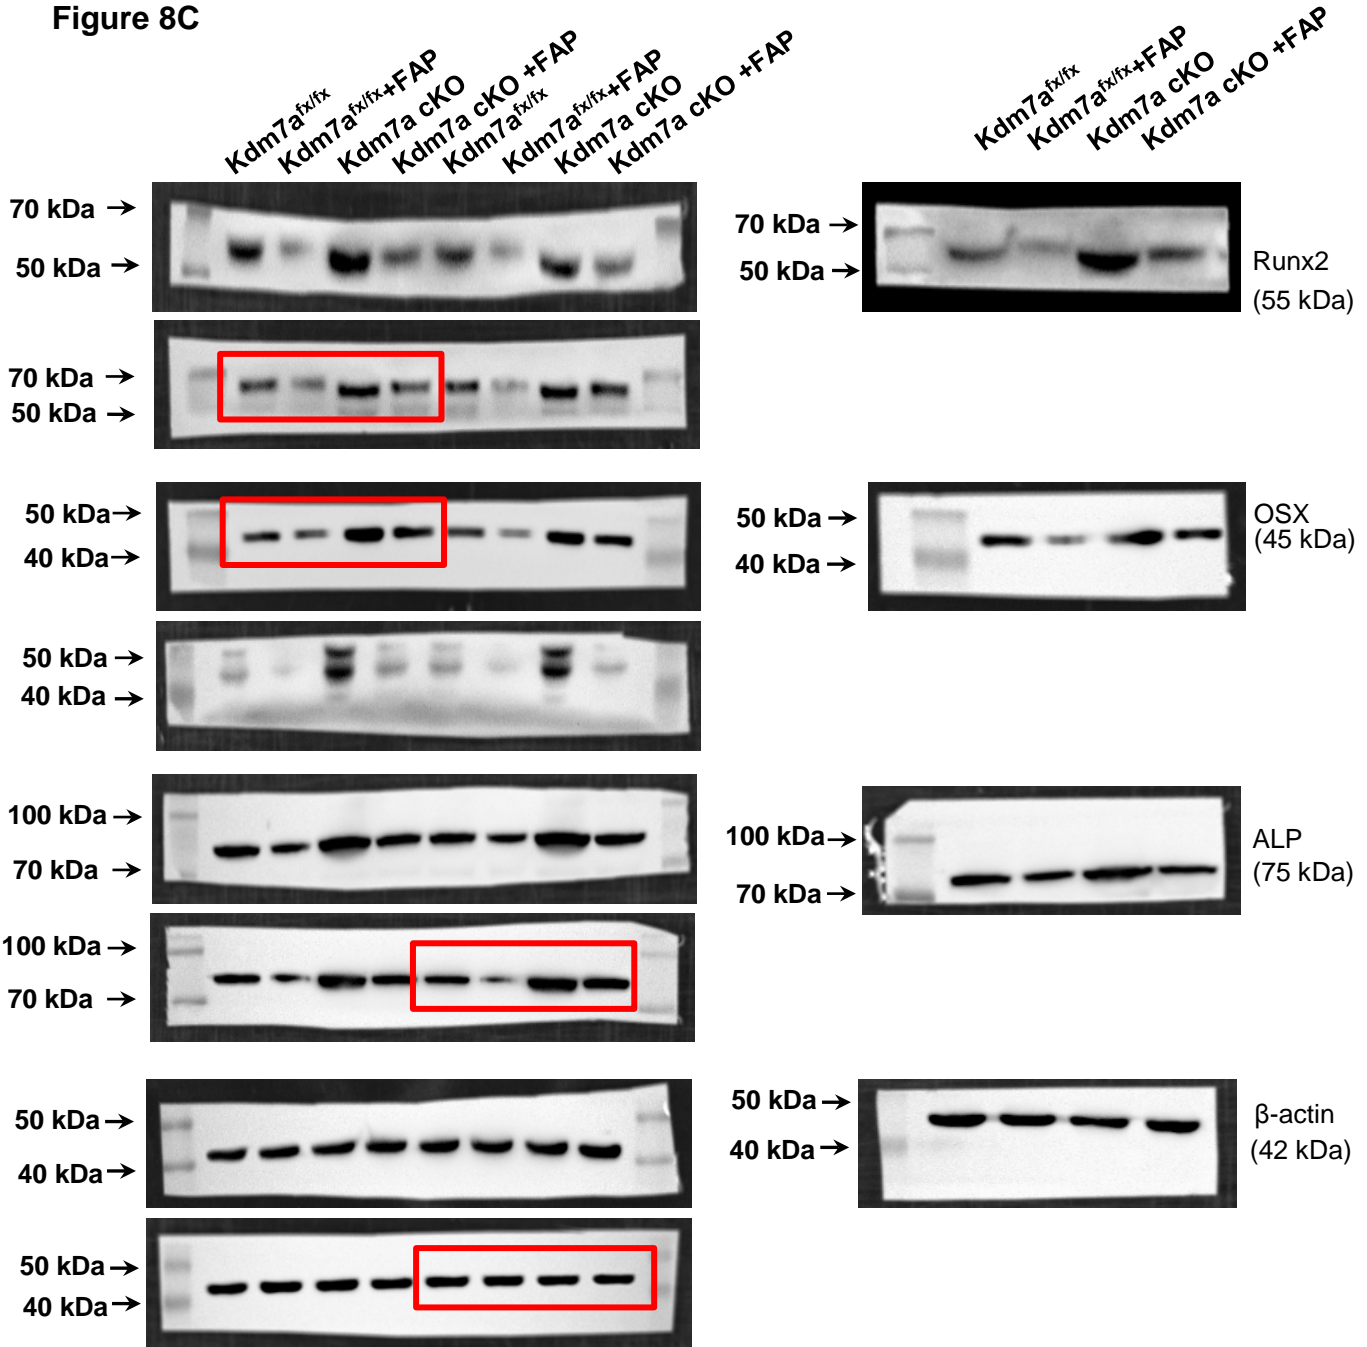

Figure 8D

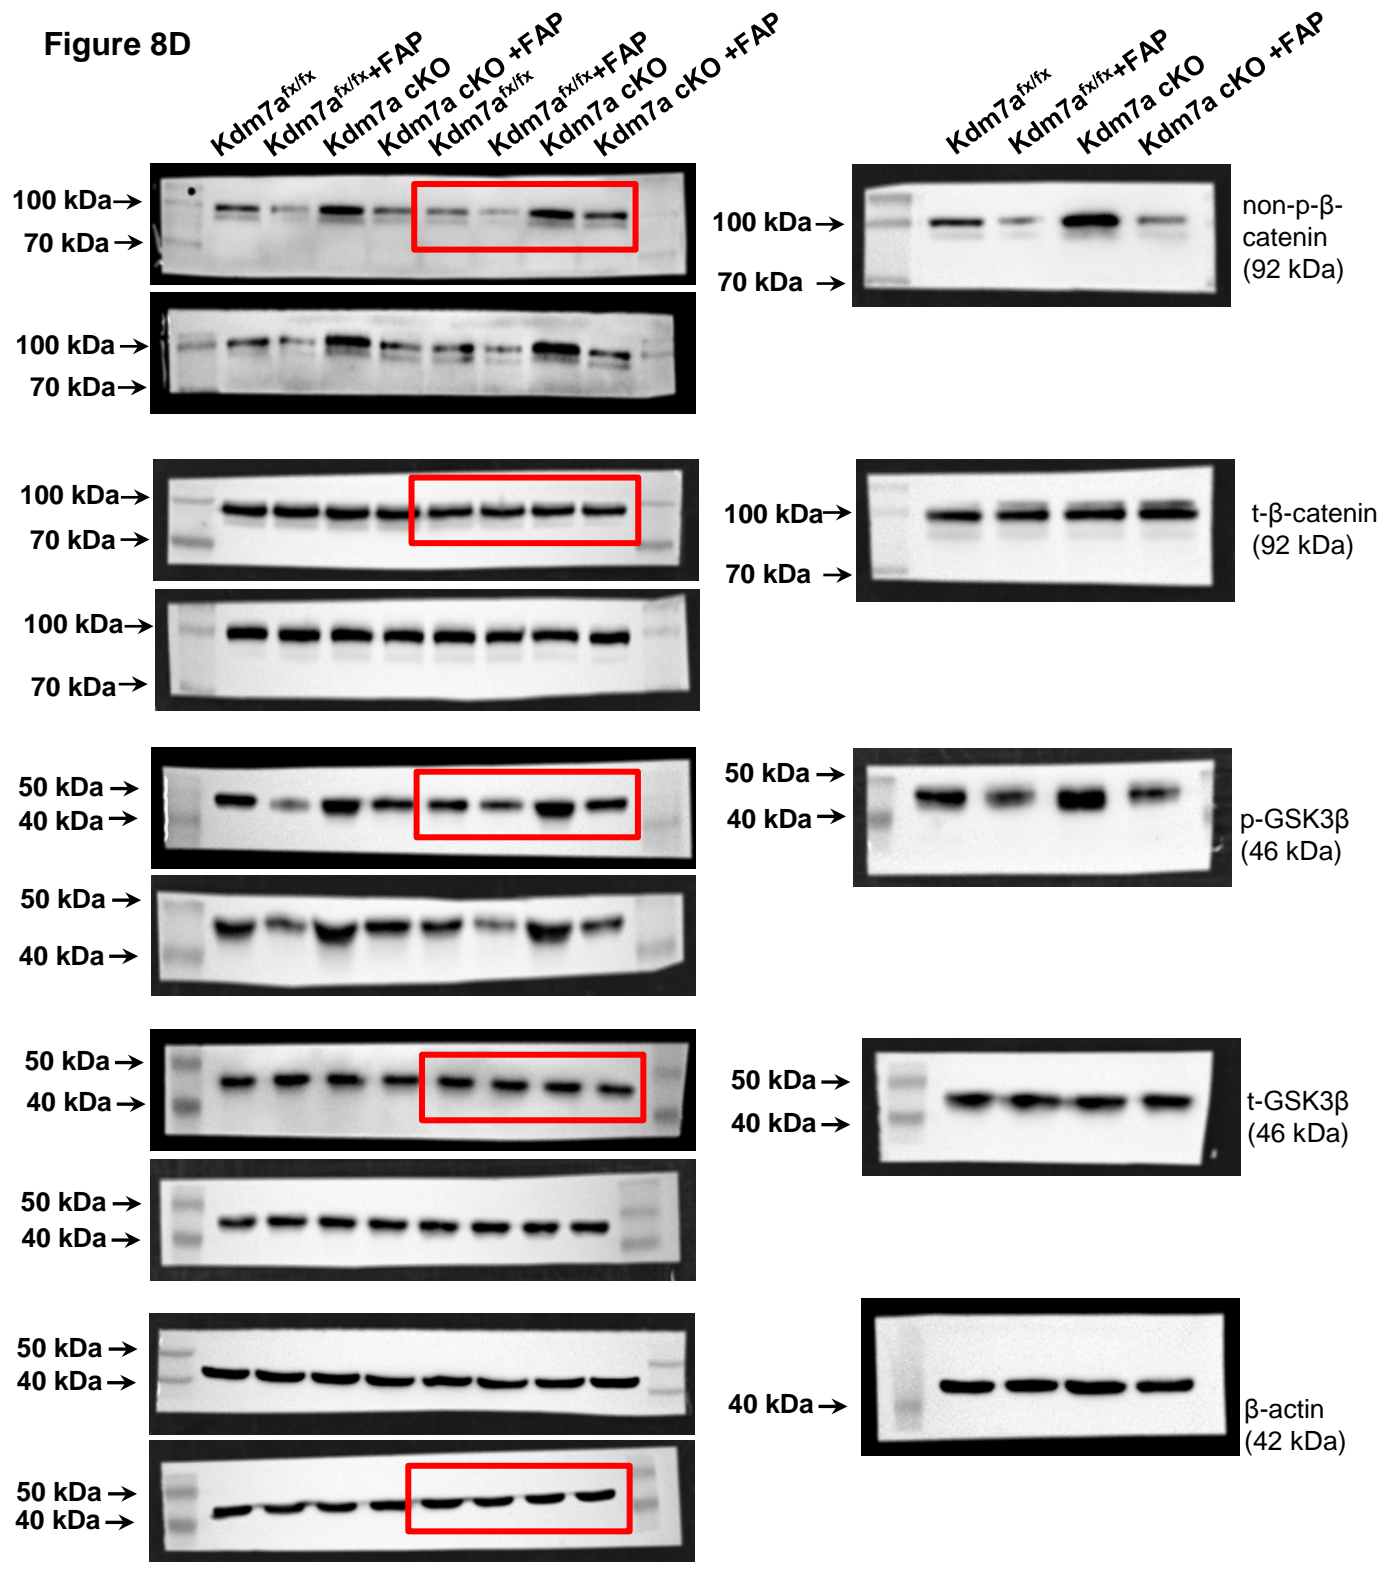



Figure S5B

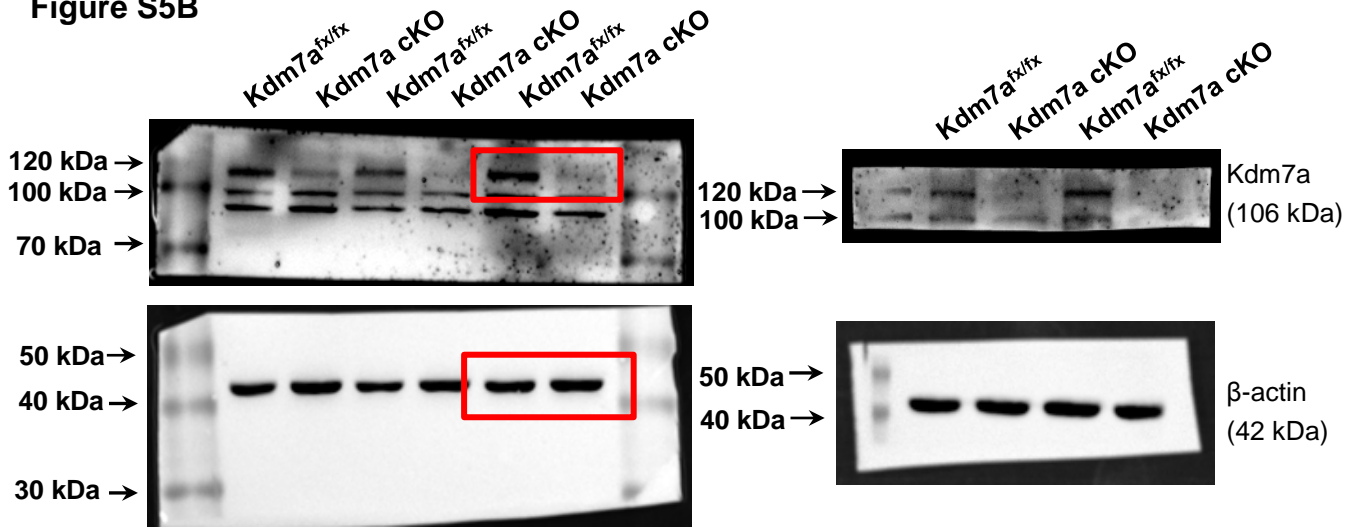

Figure S5H

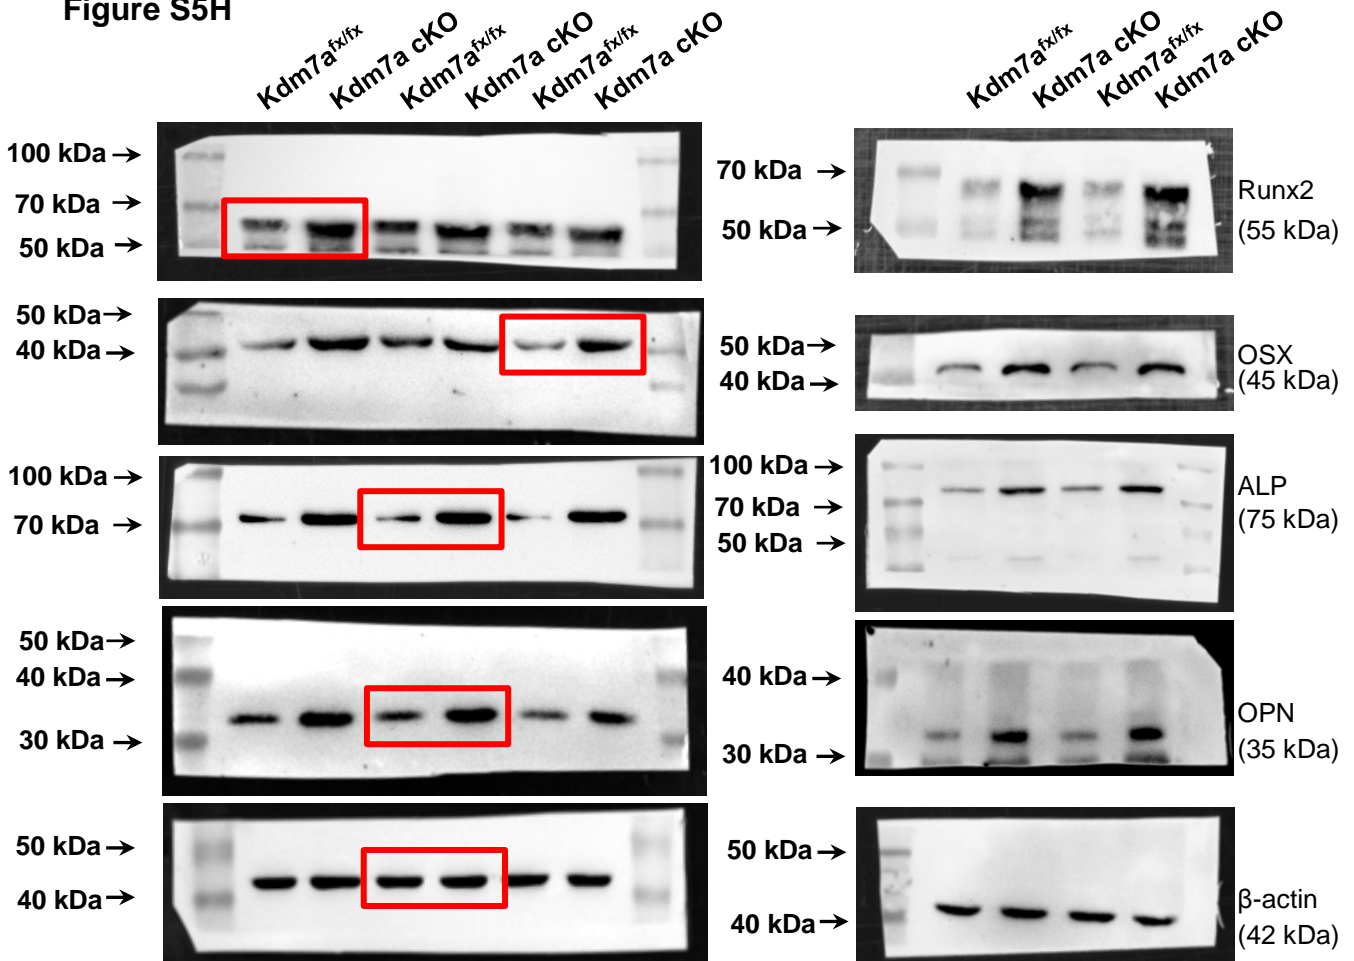

Figure S5L

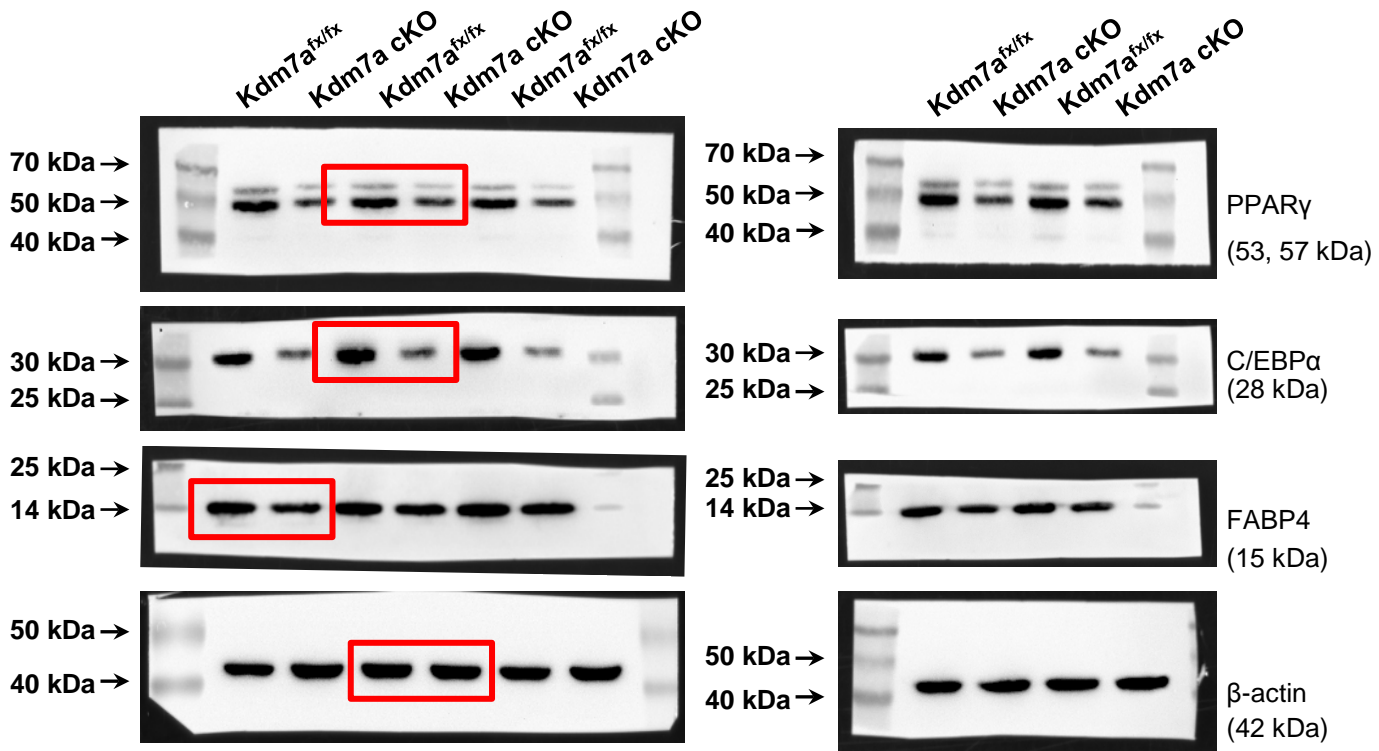

Figure S6A

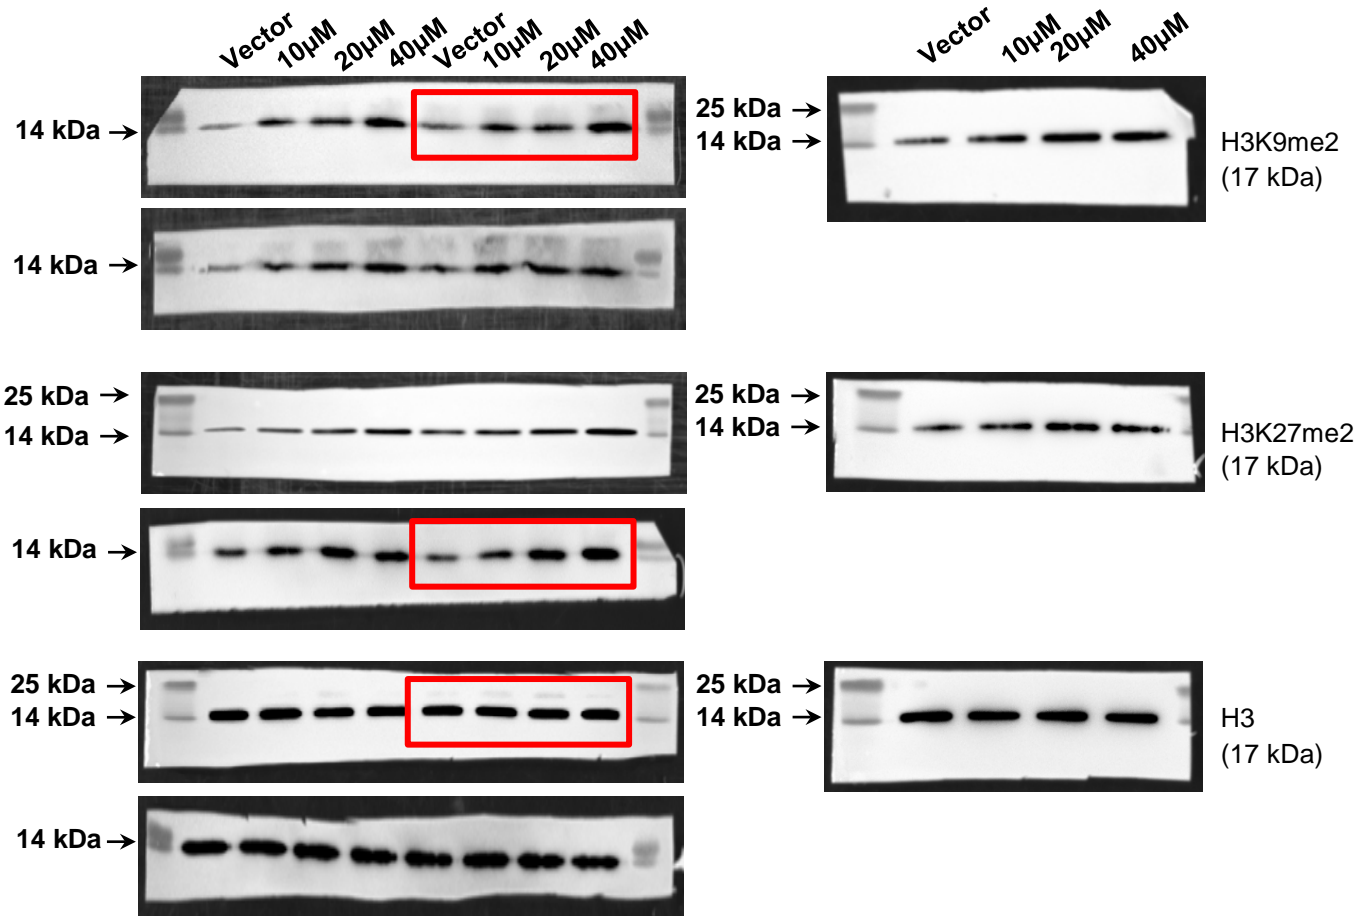

Figure S6D

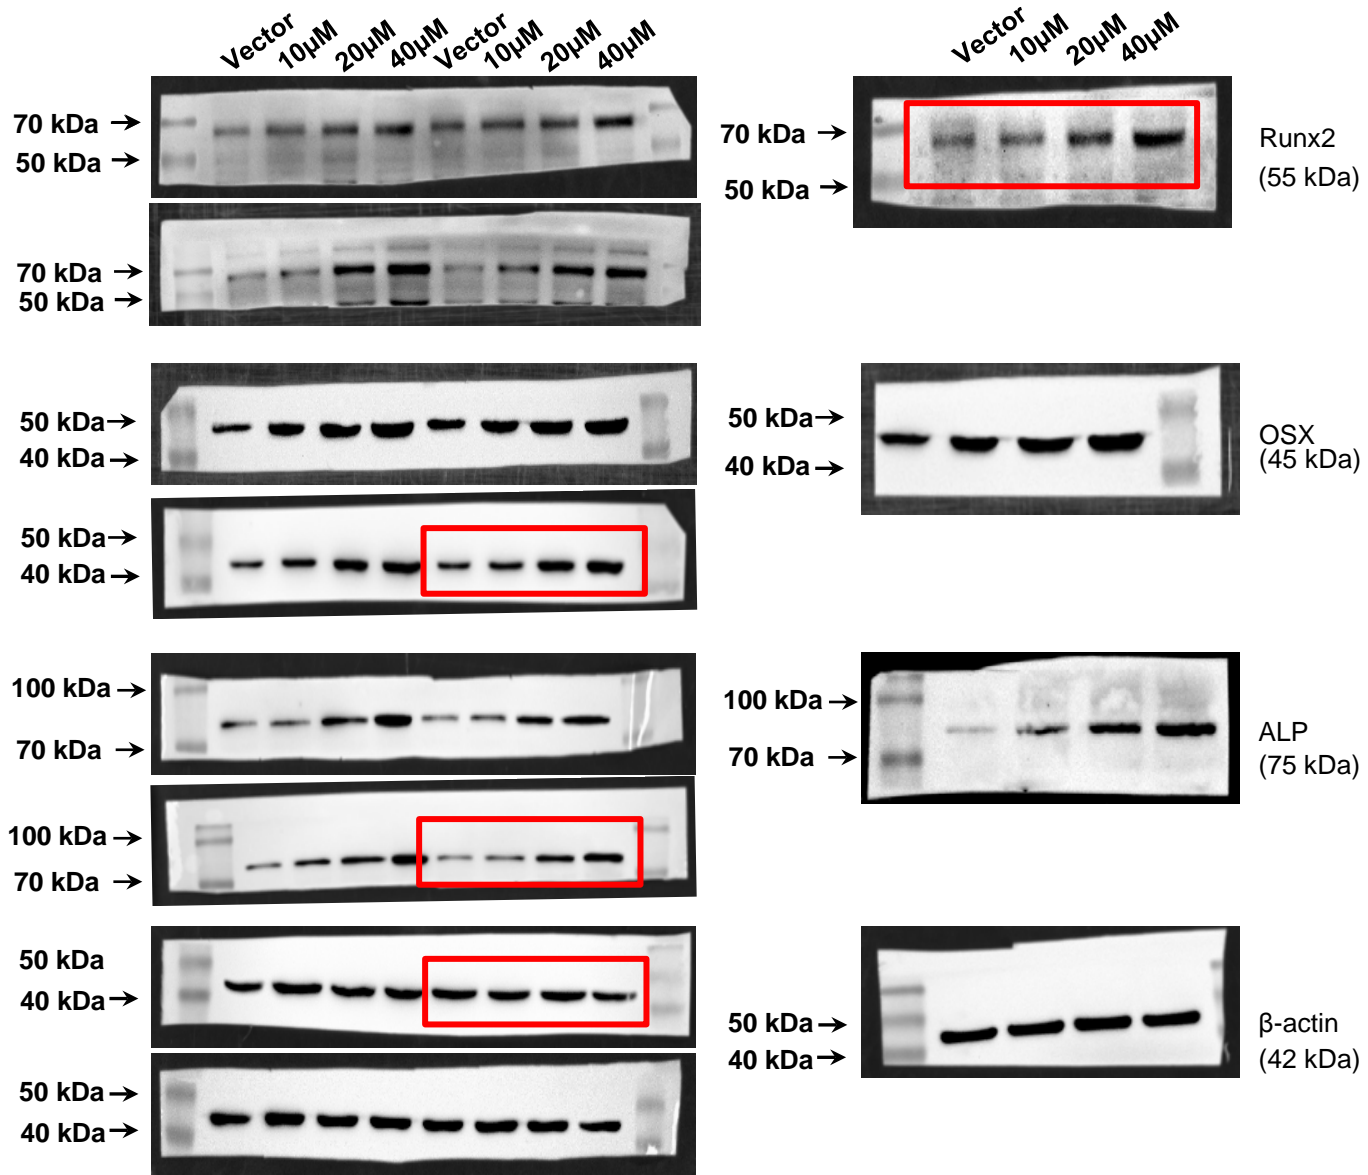

Figure S6H

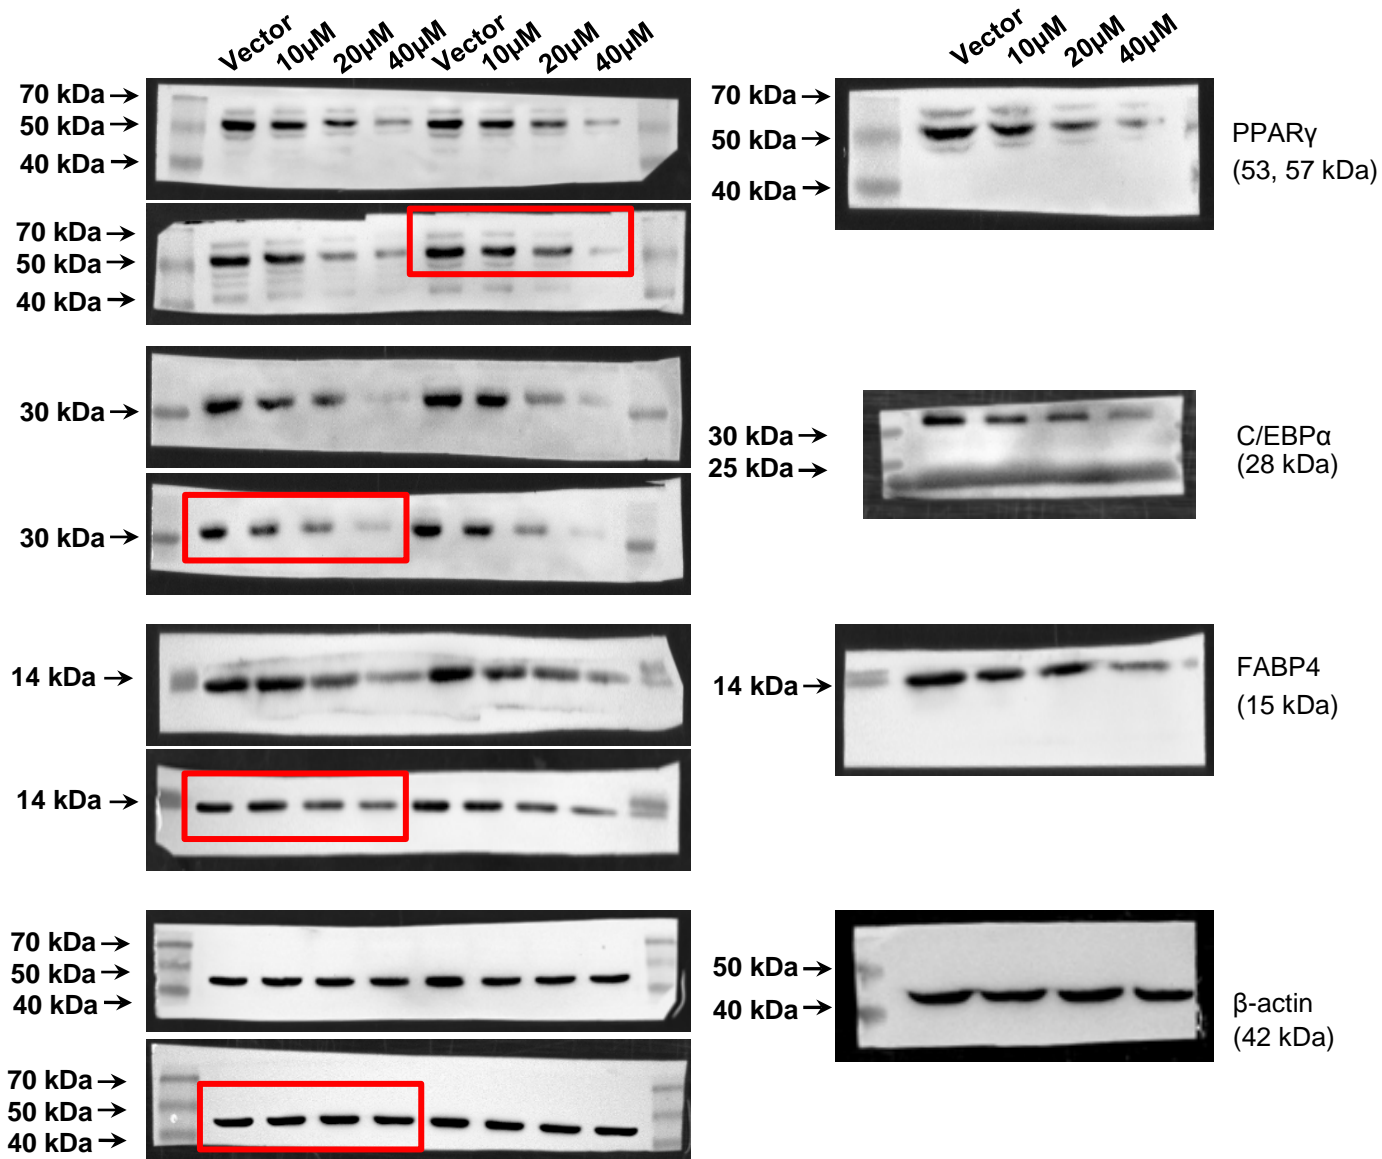

Figure S9D

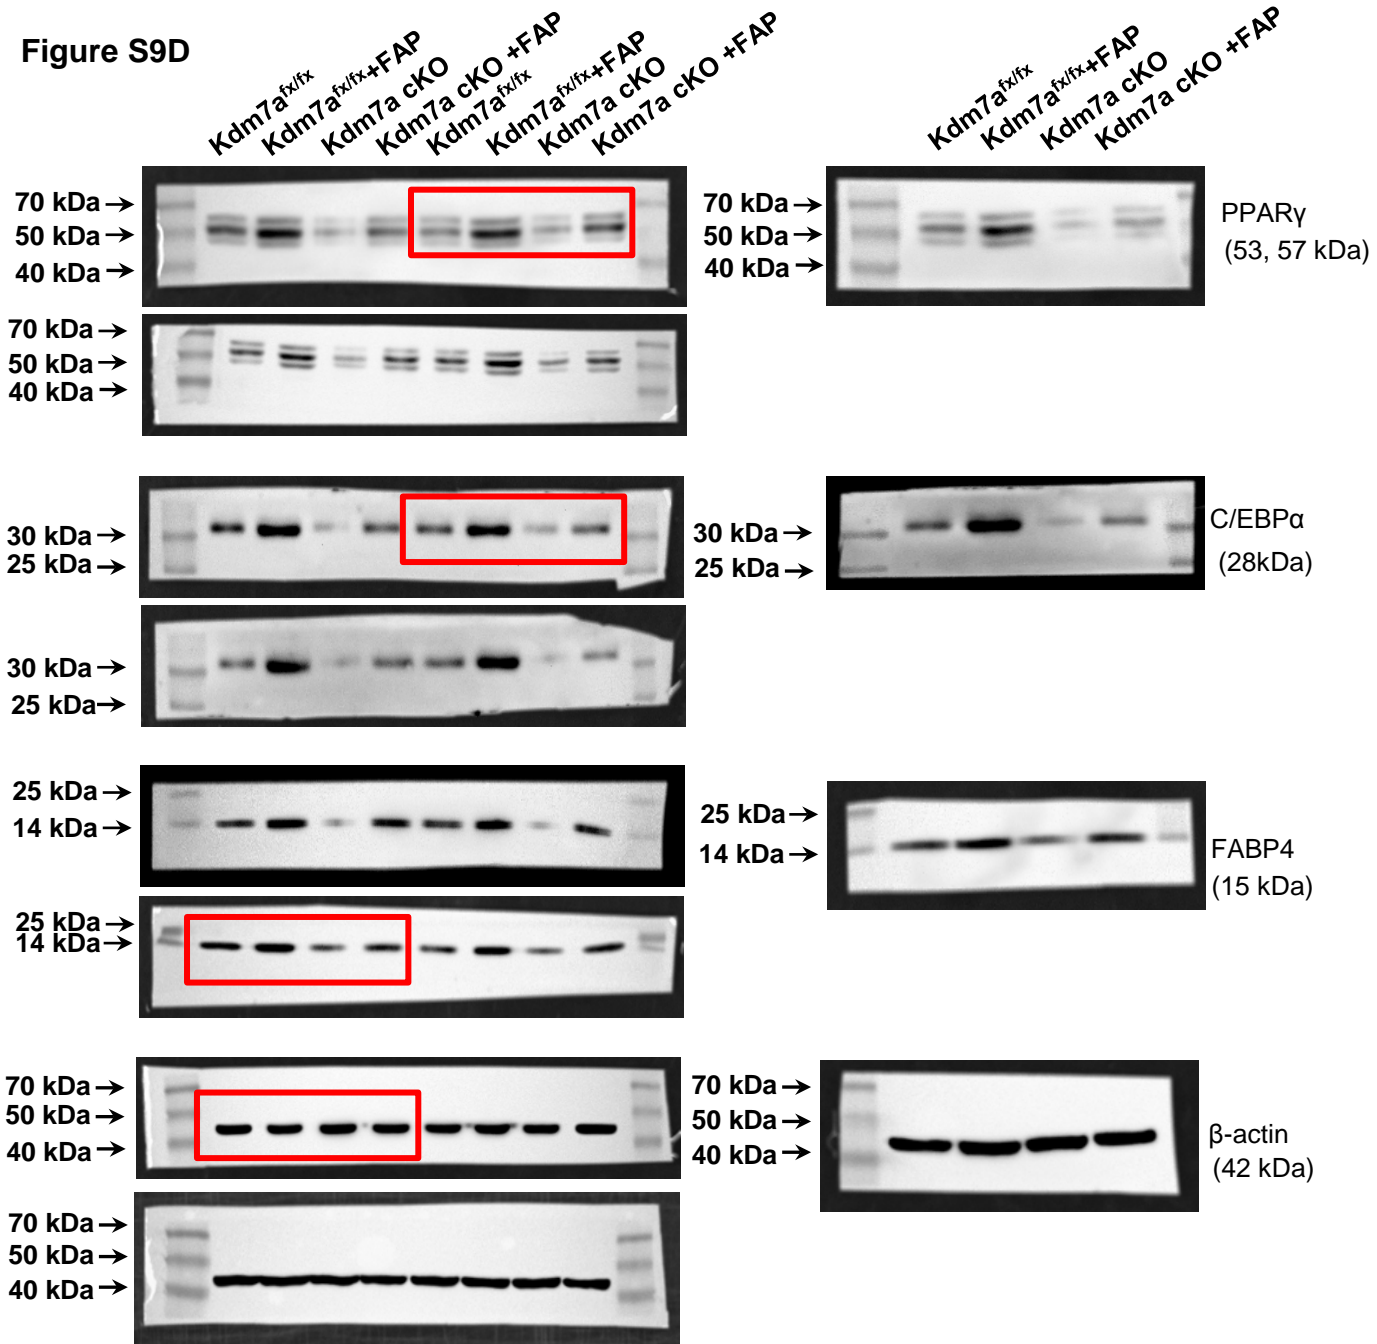

Supplement: 41419_2024_6521_MOESM3_ESM.pdf [file 41419_2024_6521_MOESM3_ESM.pdf]
