# Supplementary material for: Histone demethylase KDM7A regulates bone homeostasis through balancing osteoblast and osteoclast differentiation
Source: PubMed Central journal article supplement (PMC10861515; doi:10.1038/s41419-024-06521-z), 2024-02-12
Supplement: 41419_2024_6521_MOESM4_ESM.pdf [file 41419_2024_6521_MOESM4_ESM.pdf]

### RNA-Seq results

| Gene ID | Gene Symbol | Type | log <sub>2</sub> (Kdm7a cKO / Kdm7a <sup>fx/fx</sup> ) | FDR (Kdm7a cKO / Kdm7a <sup>fx/fx</sup> ) |
|---------|-------------|------|--------------------------------------------------------|-------------------------------------------|
| 11595   | 'Acan'      | mRNA | -10.58871464                                           | 0.00E+00                                  |
| 11826   | 'Aqp1'      | mRNA | -9.033423002                                           | 0.00E+00                                  |
| 12266   | 'C3'        | mRNA | -8.271463028                                           | 0.00E+00                                  |
| 13179   | 'Dcn'       | mRNA | -7.924812504                                           | 0.00E+00                                  |
| 13371   | 'Dio2'      | mRNA | -7.826548487                                           | 0.00E+00                                  |
| 13516   | 'Epyc'      | mRNA | -7.599912842                                           | 0.00E+00                                  |
| 14067   | 'F5'        | mRNA | -5.754887502                                           | 0.00E+00                                  |
| 14219   | 'Ccn2'      | mRNA | -5.554588852                                           | 0.00E+00                                  |
| 14560   | 'Gdf10'     | mRNA | -4.196397213                                           | 0.00E+00                                  |
| 15439   | 'Hp'        | mRNA | -3.67874853                                            | 0.00E+00                                  |
| 16181   | 'Il1rn'     | mRNA | -3.321928095                                           | 0.00E+00                                  |
| 16819   | 'Lcn2'      | mRNA | -3.253732223                                           | 0.00E+00                                  |
| 17022   | 'Lum'       | mRNA | -3.209453366                                           | 0.00E+00                                  |
| 17386   | 'Mmp13'     | mRNA | -3.185606624                                           | 0.00E+00                                  |
| 17392   | 'Mmp3'      | mRNA | -3.169925001                                           | 0.00E+00                                  |
| 18619   | 'Penk'      | mRNA | -3.054116549                                           | 0.00E+00                                  |
| 19241   | 'Tmsb4x'    | mRNA | -3                                                     | 0.00E+00                                  |
| 20257   | 'Stmn2'     | mRNA | -2.981852653                                           | 0.00E+00                                  |
| 20657   | 'Sod3'      | mRNA | -2.95419631                                            | 0.00E+00                                  |
| 21419   | Tfap2b'     | mRNA | -2.906890596                                           | 0.00E+00                                  |
| 216616  | 'Efemp1'    | mRNA | -2.863263663                                           | 0.00E+00                                  |
| 21810   | 'Tgfb1'     | mRNA | -2.856354323                                           | 0.00E+00                                  |
| 21826   | 'Thbs2'     | mRNA | -2.813554181                                           | 0.00E+00                                  |
| 22003   | 'Tpm1'      | mRNA | -2.784271309                                           | 0.00E+00                                  |
| 319480  | 'Itga11'    | mRNA | -2.774657884                                           | 0.00E+00                                  |
| 50706   | 'Postn'     | mRNA | -2.74607385                                            | 0.00E+00                                  |
| 78558   | 'Htra3'     | mRNA | -2.736965594                                           | 0.00E+00                                  |
| 110454  | 'Ly6a'      | mRNA | -2.678071905                                           | 3.75E-289                                 |
| 18162   | Npr3'       | mRNA | -2.667424661                                           | 1.29E-269                                 |
| 68588   | 'Cthrc1'    | mRNA | -2.650253961                                           | 1.46E-263                                 |
| 74511   | 'Lrrc17'    | mRNA | -2.62881679                                            | 3.08E-244                                 |
| 18126   | 'Nos2'      | mRNA | -2.614709844                                           | 2.55E-243                                 |
| 12778   | 'Ackr3'     | mRNA | -2.584962501                                           | 6.32E-227                                 |
| 17294   | 'Mest'      | mRNA | -2.584962501                                           | 7.08E-226                                 |
| 380928  | 'Lmo7'      | mRNA | -2.581422143                                           | 2.01E-206                                 |
| 12654   | 'Chil1'     | mRNA | -2.580662363                                           | 2.01E-200                                 |
| 20515   | Slc20a1'    | mRNA | -2.572578776                                           | 6.36E-181                                 |

|        |            |      |              |           |
|--------|------------|------|--------------|-----------|
| 53867  | Col5a3'    | mRNA | -2.510961919 | 5.34E-180 |
| 12839  | Col9a1'    | mRNA | -2.4639471   | 5.36E-178 |
| 12841  | 'Col9a3'   | mRNA | -2.458574148 | 5.07E-177 |
| 22418  | Wnt5a'     | mRNA | -2.432959407 | 2.04E-173 |
| 216285 | 'Alx1'     | mRNA | -2.43171624  | 3.31E-168 |
| 26432  | 'Plod2'    | mRNA | -2.415037499 | 3.46E-168 |
| 24059  | Slco2a1'   | mRNA | -2.403722186 | 2.47E-163 |
| 66222  | Serp1nb1a' | mRNA | -2.402098444 | 1.51E-159 |
| 23959  | Nt5e'      | mRNA | -2.396352936 | 1.09E-157 |
| 12159  | 'Bmp4'     | mRNA | -2.383059455 | 5.94E-157 |
| 26908  | 'Eif2s3y'  | mRNA | -2.377037731 | 4.32E-151 |
| 14836  | 'Gsc'      | mRNA | -2.36923381  | 7.49E-146 |
| 16190  | 'Il4ra'    | mRNA | -2.353636955 | 3.01E-144 |
| 23892  | Grem1'     | mRNA | -2.349584438 | 1.42E-141 |
| 12577  | Cdkn1c'    | mRNA | -2.331843564 | 1.91E-139 |
| 13835  | Epha1'     | mRNA | -2.286881148 | 4.96E-134 |
| 16840  | Cnmd'      | mRNA | -2.273018494 | 1.08E-133 |
| 26900  | 'Ddx3y'    | mRNA | -2.250961574 | 3.12E-132 |
| 68655  | Fndc1'     | mRNA | -2.24469277  | 6.83E-128 |
| 320078 | Olfml2b'   | mRNA | -2.235628248 | 1.12E-126 |
| 16012  | 'Igfbp6'   | mRNA | -2.219604604 | 4.86E-124 |
| 12022  | Barx1'     | mRNA | -2.207044457 | 1.46E-122 |
| 23937  | Mab21l2'   | mRNA | -2.182203331 | 2.48E-121 |
| 14461  | Gata2'     | mRNA | -2.169925001 | 1.47E-119 |
| 170768 | Pfkfb3'    | mRNA | -2.157676456 | 2.12E-117 |
| 15117  | Has2'      | mRNA | -2.133991014 | 4.00E-115 |
| 20502  | Slc16a2'   | mRNA | -2.132495172 | 3.35E-112 |
| 11535  | Adm'       | mRNA | -2.115477217 | 8.30E-112 |
| 21822  | Tgtp1'     | mRNA | -2.112089813 | 1.20E-110 |
| 19737  | Rgs5'      | mRNA | -2.094973598 | 2.04E-107 |
| 21943  | Tnfsf11'   | mRNA | -2.086826672 | 3.92E-107 |
| 16371  | Irx1'      | mRNA | -2.08451656  | 1.34E-106 |
| 19659  | Rbp1'      | mRNA | -2.035824933 | 9.51E-104 |
| 18511  | Pax9'      | mRNA | -2.034316059 | 3.60E-103 |
| 14758  | Gpm6b'     | mRNA | -2.02045061  | 1.12E-102 |
| 13876  | Erg'       | mRNA | -2.014260693 | 1.23E-100 |
| 17268  | Meis1'     | mRNA | -2.011227255 | 4.61E-100 |
| 64074  | Smoc2'     | mRNA | -2.009803175 | 5.23E-98  |
| 242553 | Kank4'     | mRNA | -2           | 4.30E-96  |
| 20723  | Serp1nb9'  | mRNA | -1.991962681 | 2.25E-95  |

|        |           |      |              |          |
|--------|-----------|------|--------------|----------|
| 18491  | Pappa'    | mRNA | -1.978451798 | 4.03E-94 |
| 18111  | Nnat'     | mRNA | -1.928446739 | 7.51E-94 |
| 12642  | Ch25h'    | mRNA | -1.920565533 | 2.11E-92 |
| 18552  | Pcsk5'    | mRNA | -1.920565533 | 1.85E-91 |
| 72780  | Rspo3'    | mRNA | -1.906890596 | 5.21E-91 |
| 15122  | 'Hba-a1'  | mRNA | -1.901819606 | 2.77E-90 |
| 18505  | Pax3'     | mRNA | -1.898732977 | 1.39E-88 |
| 64075  | Smoc1'    | mRNA | -1.894290559 | 4.52E-85 |
| 18549  | 'Pcsk2'   | mRNA | -1.882643049 | 3.74E-81 |
| 11668  | 'Aldh1a1' | mRNA | -1.871675903 | 3.98E-79 |
| 26358  | 'Aldh1a7' | mRNA | -1.869192764 | 2.00E-76 |
| 12815  | 'Col11a2' | mRNA | -1.868255746 | 2.17E-76 |
| 20310  | Cxcl2'    | mRNA | -1.866084379 | 3.03E-75 |
| 12160  | Bmp5'     | mRNA | -1.859822342 | 1.00E-74 |
| 12810  | Coch'     | mRNA | -1.857980995 | 6.31E-74 |
| 18606  | Enpp2'    | mRNA | -1.856790358 | 9.27E-73 |
| 67784  | Plxnd1'   | mRNA | -1.844049722 | 1.27E-72 |
| 20708  | Serpib6b' | mRNA | -1.840521786 | 2.36E-72 |
| 18993  | Pou3f3'   | mRNA | -1.837025789 | 6.96E-72 |
| 59012  | Moxd1'    | mRNA | -1.836501268 | 1.41E-71 |
| 14049  | Eya2'     | mRNA | -1.832890014 | 2.79E-71 |
| 20592  | 'Kdm5d'   | mRNA | -1.830074999 | 1.47E-70 |
| 17116  | Mab2111'  | mRNA | -1.821029859 | 4.22E-70 |
| 68861  | Dipk2a'   | mRNA | -1.820611019 | 1.03E-66 |
| 20893  | Bhlhe40'  | mRNA | -1.818161677 | 4.76E-66 |
| 14432  | Gap43'    | mRNA | -1.817135943 | 1.63E-65 |
| 69540  | Klk10'    | mRNA | -1.810814624 | 8.13E-65 |
| 60531  | Npvf'     | mRNA | -1.790076931 | 1.11E-64 |
| 19283  | Ptprz1'   | mRNA | -1.789557976 | 5.83E-63 |
| 15229  | Foxd1'    | mRNA | -1.78506696  | 1.81E-62 |
| 96875  | Prg4'     | mRNA | -1.778951746 | 2.70E-62 |
| 54635  | Pdgfc'    | mRNA | -1.770518154 | 2.83E-62 |
| 18811  | Prl2c2'   | mRNA | -1.754722665 | 8.92E-62 |
| 17380  | Mme'      | mRNA | -1.750021747 | 2.07E-61 |
| 14261  | Fmo1'     | mRNA | -1.745070644 | 4.95E-61 |
| 14681  | Gnao1'    | mRNA | -1.743703254 | 2.81E-59 |
| 239250 | Slitrk6'  | mRNA | -1.742503778 | 2.85E-59 |
| 12950  | Hapln1'   | mRNA | -1.728009118 | 1.19E-58 |
| 20618  | Sncg'     | mRNA | -1.725936128 | 3.77E-57 |
| 94185  | Tnfrsf21' | mRNA | -1.717600269 | 6.43E-57 |

|           |             |      |              |          |
|-----------|-------------|------|--------------|----------|
| 17067     | Ly6c1'      | mRNA | -1.709290636 | 8.48E-57 |
| 215798    | Adgrg6'     | mRNA | -1.708537186 | 1.03E-55 |
| 330122    | Cxcl3'      | mRNA | -1.685848545 | 2.50E-55 |
| 21828     | Thbs4'      | mRNA | -1.67851384  | 1.33E-54 |
| 16668     | Krt18'      | mRNA | -1.678071905 | 1.65E-54 |
| 215653    | Rassf2'     | mRNA | -1.676958285 | 3.95E-54 |
| 12904     | Crabp2'     | mRNA | -1.673771768 | 1.08E-53 |
| 407790    | Ndufa4l2'   | mRNA | -1.670692375 | 1.48E-53 |
| 102637507 | 'Gm34298'   | mRNA | -1.664660745 | 6.30E-53 |
| 110257    | Hba-a2'     | mRNA | -1.652076697 | 6.78E-53 |
| 22290     | Uty'        | mRNA | -1.647612151 | 3.75E-52 |
| 72361     | Ces2g'      | mRNA | -1.64689025  | 5.30E-51 |
| 107587    | Osr2'       | mRNA | -1.623308812 | 6.02E-51 |
| 16164     | Il13ra1'    | mRNA | -1.612976877 | 4.63E-50 |
| 12819     | 'Col15a1'   | mRNA | -1.612183969 | 2.00E-49 |
| 12583     | Cdo1'       | mRNA | -1.607417352 | 5.61E-49 |
| 67547     | Slc39a8'    | mRNA | -1.602407635 | 6.43E-49 |
| 15216     | Hfe'        | mRNA | -1.599769977 | 1.14E-48 |
| 81799     | C1qtnf3'    | mRNA | -1.582771619 | 5.44E-48 |
| 77569     | Limch1'     | mRNA | -1.55818317  | 6.89E-48 |
| 217066    | Elobl'      | mRNA | -1.556591643 | 1.29E-47 |
| 17470     | Cd200'      | mRNA | -1.553935605 | 5.25E-47 |
| 11830     | Aqp5'       | mRNA | -1.552972386 | 7.98E-47 |
| 24117     | Wif1'       | mRNA | -1.552858236 | 1.42E-46 |
| 16691     | Krt8'       | mRNA | -1.551015169 | 3.63E-46 |
| 226075    | Glis3'      | mRNA | -1.54689446  | 4.87E-46 |
| 13628     | Eef1a2'     | mRNA | -1.546488353 | 1.45E-45 |
| 30060     | Meltf'      | mRNA | -1.543314803 | 1.80E-44 |
| 234356    | Csgalnact1' | mRNA | -1.540568381 | 2.49E-44 |
| 16156     | Il11'       | mRNA | -1.540568381 | 9.78E-44 |
| 18828     | Plscr2'     | mRNA | -1.5334322   | 3.94E-43 |
| 15945     | Cxcl10'     | mRNA | -1.533123569 | 3.21E-42 |
| 11695     | Alx4'       | mRNA | -1.532728535 | 3.37E-42 |
| 17921     | Myo7a'      | mRNA | -1.530883867 | 8.94E-42 |
| 18605     | Enpp1'      | mRNA | -1.525583954 | 1.96E-41 |
| 114249    | Npnt'       | mRNA | -1.498637701 | 2.92E-41 |
| 216892    | Spns2'      | mRNA | -1.493188307 | 1.27E-40 |
| 18053     | Ngfr'       | mRNA | -1.487545956 | 1.06E-39 |
| 67451     | Pkp2'       | mRNA | -1.483082887 | 1.17E-39 |
| 215446    | Entpd3'     | mRNA | -1.481462387 | 1.60E-39 |

|           |                 |      |              |          |
|-----------|-----------------|------|--------------|----------|
| 667742    | Piezo2'         | mRNA | -1.480066048 | 2.75E-39 |
| 11550     | Adra1d'         | mRNA | -1.47883415  | 7.53E-39 |
| 14013     | Mecom'          | mRNA | -1.47447914  | 2.24E-38 |
| 14563     | Gdf5'           | mRNA | -1.46712601  | 7.61E-38 |
| 93960     | Nkd1'           | mRNA | -1.465663572 | 7.88E-38 |
| 329251    | Ppp1r12b'       | mRNA | -1.459431619 | 9.23E-38 |
| 110310    | Krt7'           | mRNA | -1.451988635 | 9.99E-38 |
| 29818     | Hspb7'          | mRNA | -1.450252192 | 1.06E-37 |
| 12578     | Cdkn2a'         | mRNA | -1.436099115 | 2.12E-36 |
| 17182     | 'Matn3'         | mRNA | -1.426897654 | 1.61E-34 |
| 12722     | 'Clca3a1'       | mRNA | -1.41740156  | 4.62E-34 |
| 80877     | 'Lrba'          | mRNA | -1.412693559 | 5.48E-34 |
| 19876     | Robo1'          | mRNA | -1.409938345 | 5.51E-34 |
| 268451    | Rab11fip4'      | mRNA | -1.408805546 | 1.10E-32 |
| 83925     | Trps1'          | mRNA | -1.408535933 | 2.43E-32 |
| 13824     | 'Epb41l4a'      | mRNA | -1.402964667 | 3.06E-32 |
| 13717     | Eln'            | mRNA | -1.399747628 | 3.32E-32 |
| 228846    | 'D630003M21Rik' | mRNA | -1.399607459 | 7.12E-30 |
| 20665     | Sox10'          | mRNA | -1.398549376 | 8.93E-30 |
| 13798     | En1'            | mRNA | -1.397876948 | 1.30E-29 |
| 213119    | Itga10'         | mRNA | -1.394278939 | 1.69E-29 |
| 109700    | Itga1'          | mRNA | -1.392317423 | 3.94E-29 |
| 24056     | Sh3bp5'         | mRNA | -1.389652181 | 5.79E-29 |
| 14585     | Gfra1'          | mRNA | -1.389042291 | 2.52E-28 |
| 100039796 | Tgtp2'          | mRNA | -1.373458396 | 3.20E-28 |
| 242316    | Gdf6'           | mRNA | -1.370465872 | 2.28E-27 |
| 237979    | Sdk2'           | mRNA | -1.36923381  | 3.85E-27 |
| 12268     | C4b'            | mRNA | -1.366071622 | 1.34E-26 |
| 16669     | Krt19'          | mRNA | -1.363404731 | 7.81E-26 |
| 100689    | Spon2'          | mRNA | -1.3594028   | 7.99E-26 |
| 11474     | Actn3'          | mRNA | -1.353636955 | 9.88E-26 |
| 12840     | Col9a2'         | mRNA | -1.351472371 | 1.03E-25 |
| 11694     | Alx3'           | mRNA | -1.34692807  | 1.10E-25 |
| 263803    | Pkn3'           | mRNA | -1.344445531 | 1.91E-25 |
| 15234     | Hgf'            | mRNA | -1.341036918 | 5.91E-25 |
| 228662    | Btbd3'          | mRNA | -1.336895054 | 7.60E-25 |
| 64899     | Lpin3'          | mRNA | -1.336182079 | 1.11E-24 |
| 58802     | Kcnmb4'         | mRNA | -1.333126301 | 1.14E-24 |
| 14089     | Fap'            | mRNA | -1.33268879  | 1.58E-24 |
| 15891     | lbsp'           | mRNA | -1.330957061 | 8.97E-24 |

|           |            |      |              |          |
|-----------|------------|------|--------------|----------|
| 11501     | Adam8'     | mRNA | -1.329752311 | 1.30E-23 |
| 11600     | Angpt1'    | mRNA | -1.327396308 | 1.53E-23 |
| 67606     | Fibin'     | mRNA | -1.325133761 | 2.98E-23 |
| 213391    | Rassf4'    | mRNA | -1.313890776 | 3.63E-23 |
| 94249     | Slc24a3'   | mRNA | -1.305626283 | 5.46E-23 |
| 17001     | Ltc4s'     | mRNA | -1.304854582 | 1.32E-22 |
| 77590     | Chst15'    | mRNA | -1.30256277  | 1.48E-22 |
| 20297     | Ccl20'     | mRNA | -1.299560282 | 1.89E-22 |
| 54156     | Egfl6'     | mRNA | -1.298081353 | 2.29E-22 |
| 94216     | 'Col4a6'   | mRNA | -1.296182682 | 3.32E-22 |
| 59036     | Dact1'     | mRNA | -1.293953467 | 4.70E-22 |
| 73340     | Nptxr'     | mRNA | -1.289506617 | 6.98E-22 |
| 15228     | Foxg1'     | mRNA | -1.28757659  | 8.94E-22 |
| 19220     | Ptgfr'     | mRNA | -1.286118019 | 2.32E-21 |
| 23948     | Mmp17'     | mRNA | -1.285128177 | 3.67E-21 |
| 100503605 | 'Hbb-bs'   | mRNA | -1.278301162 | 8.89E-21 |
| 20706     | Serpinb9b' | mRNA | -1.275893617 | 1.26E-20 |
| 80910     | Gpr84'     | mRNA | -1.273719002 | 3.56E-20 |
| 330723    | Htra4'     | mRNA | -1.271804615 | 3.60E-20 |
| 18741     | Pitx2'     | mRNA | -1.267695783 | 9.45E-20 |
| 56224     | Tspan5'    | mRNA | -1.267480311 | 1.61E-19 |
| 16918     | Mycl'      | mRNA | -1.267068138 | 2.11E-19 |
| 56847     | Aldh1a3'   | mRNA | -1.264499815 | 3.34E-19 |
| 19206     | Ptch1'     | mRNA | -1.264415636 | 3.62E-19 |
| 269152    | Kif26b'    | mRNA | -1.263541593 | 4.54E-19 |
| 13602     | Sparcl1'   | mRNA | -1.263034406 | 5.57E-19 |
| 16170     | Il16'      | mRNA | -1.262349203 | 9.89E-19 |
| 11601     | Angpt2'    | mRNA | -1.262000586 | 1.33E-18 |
| 13617     | Ednra'     | mRNA | -1.261441148 | 1.93E-18 |
| 227358    | Erfe'      | mRNA | -1.259781428 | 4.08E-18 |
| 12985     | Csf3'      | mRNA | -1.25885873  | 4.59E-18 |
| 13809     | Enpep'     | mRNA | -1.257157839 | 4.87E-18 |
| 21386     | 'Tbx3'     | mRNA | -1.245112498 | 6.68E-18 |
| 19662     | Rbp4'      | mRNA | -1.229246092 | 7.22E-18 |
| 11876     | Artn'      | mRNA | -1.228624375 | 7.42E-18 |
| 271970    | Arsj'      | mRNA | -1.227535725 | 1.00E-17 |
| 13390     | Dlx1'      | mRNA | -1.227068909 | 5.02E-17 |
| 78923     | Chsy3'     | mRNA | -1.224510139 | 7.70E-17 |
| 72634     | Tdrkh'     | mRNA | -1.222392421 | 2.87E-16 |
| 226866    | Sbspon'    | mRNA | -1.218384933 | 2.94E-16 |

|           |                |      |              |          |
|-----------|----------------|------|--------------|----------|
| 56375     | B4galt4'       | mRNA | -1.211838643 | 3.03E-16 |
| 65221     | Slc15a3'       | mRNA | -1.206450877 | 4.26E-16 |
| 19016     | Pparg'         | mRNA | -1.205997128 | 4.47E-16 |
| 243958    | Siglecg'       | mRNA | -1.202714937 | 5.04E-16 |
| 14168     | Fgf13'         | mRNA | -1.201802017 | 6.07E-16 |
| 13123     | Cyp7b1'        | mRNA | -1.200119574 | 9.75E-16 |
| 110075    | 'Bmp3'         | mRNA | -1.196397213 | 9.97E-16 |
| 18576     | Pde3b'         | mRNA | -1.189602486 | 1.16E-15 |
| 18740     | Pitx1'         | mRNA | -1.186401937 | 1.26E-15 |
| 14538     | Gcnt2'         | mRNA | -1.179259727 | 1.67E-15 |
| 83691     | Crispld1'      | mRNA | -1.178052882 | 2.10E-15 |
| 19229     | Ptk2b'         | mRNA | -1.175258446 | 2.24E-15 |
| 13032     | Ctsc'          | mRNA | -1.173064709 | 2.40E-15 |
| 14942     | Gzme'          | mRNA | -1.172767751 | 2.78E-15 |
| 104816    | Aspg'          | mRNA | -1.167944637 | 4.76E-15 |
| 219140    | Spata13'       | mRNA | -1.163285804 | 1.05E-14 |
| 237759    | 'Col23a1'      | mRNA | -1.154187341 | 1.15E-14 |
| 54419     | 'Cldn6'        | mRNA | -1.153623189 | 1.24E-14 |
| 70417     | 'Megf10'       | mRNA | -1.150242636 | 3.43E-14 |
| 11770     | Fabp4'         | mRNA | -1.146005124 | 4.63E-14 |
| 14254     | Flt1'          | mRNA | -1.142957954 | 4.83E-14 |
| 18213     | Ntrk3'         | mRNA | -1.141355849 | 7.94E-14 |
| 14371     | Fzd9'          | mRNA | -1.140257886 | 1.58E-13 |
| 11551     | Adra2a'        | mRNA | -1.138784591 | 1.68E-13 |
| 240892    | Dusp27'        | mRNA | -1.137503524 | 2.00E-13 |
| 13396     | Dlx6'          | mRNA | -1.132351036 | 3.31E-13 |
| 68527     | 'Ucma'         | mRNA | -1.12822571  | 3.63E-13 |
| 53321     | Cntnap1'       | mRNA | -1.12563311  | 4.10E-13 |
| 14007     | Celf2'         | mRNA | -1.121306296 | 5.58E-13 |
| 67020     | Tmem88'        | mRNA | -1.118458596 | 5.92E-13 |
| 70415     | Stk26'         | mRNA | -1.117491637 | 6.39E-13 |
| 108169105 | 'LOC108169105' | mRNA | -1.116659851 | 7.83E-13 |
| 21892     | Tll1'          | mRNA | -1.112894056 | 8.61E-13 |
| 140580    | Elmo1'         | mRNA | -1.112474729 | 8.85E-13 |
| 373864    | Col27a1'       | mRNA | -1.108524457 | 9.96E-13 |
| 30956     | Aass'          | mRNA | -1.106041637 | 2.25E-12 |
| 13837     | Epha3'         | mRNA | -1.10496956  | 2.26E-12 |
| 106565    | Dlk2'          | mRNA | -1.098680033 | 5.67E-12 |
| 171170    | Mbnl3'         | mRNA | -1.097663259 | 5.82E-12 |
| 320873    | Cdh10'         | mRNA | -1.097253459 | 6.51E-12 |

|           |           |      |              |          |
|-----------|-----------|------|--------------|----------|
| 219134    | Shisa2'   | mRNA | -1.094841434 | 6.71E-12 |
| 330790    | Hapln4'   | mRNA | -1.092393604 | 6.81E-12 |
| 67664     | Rnf125'   | mRNA | -1.091147888 | 7.27E-12 |
| 239618    | Pdzrn4'   | mRNA | -1.088024748 | 8.02E-12 |
| 12020     | Nkx3-2'   | mRNA | -1.087785484 | 8.91E-12 |
| 320916    | Wscd2'    | mRNA | -1.086622355 | 1.30E-11 |
| 16565     | Kif21b'   | mRNA | -1.085079243 | 1.62E-11 |
| 171463    | Il17rd'   | mRNA | -1.084474568 | 2.01E-11 |
| 228564    | Frmf5'    | mRNA | -1.081427599 | 2.18E-11 |
| 67621     | Bend5'    | mRNA | -1.080401507 | 2.18E-11 |
| 20666     | Sox11'    | mRNA | -1.078002512 | 2.32E-11 |
| 56198     | Heyl'     | mRNA | -1.073229911 | 2.56E-11 |
| 218772    | Rarb'     | mRNA | -1.072669068 | 3.41E-11 |
| 226041    | Pgm5'     | mRNA | -1.072485507 | 3.44E-11 |
| 544963    | Iqgap2'   | mRNA | -1.069708972 | 3.80E-11 |
| 215632    | Psd4'     | mRNA | -1.068809158 | 4.59E-11 |
| 68312     | Gstm7'    | mRNA | -1.066437985 | 4.81E-11 |
| 29815     | Bcar3'    | mRNA | -1.065802058 | 5.65E-11 |
| 268354    | Tafa2'    | mRNA | -1.06511729  | 7.01E-11 |
| 320365    | Fry'      | mRNA | -1.061927749 | 9.21E-11 |
| 103889    | Hoxb2'    | mRNA | -1.060598825 | 9.30E-11 |
| 107303348 | 'Gm45935' | mRNA | -1.058893689 | 9.71E-11 |
| 56047     | Msln'     | mRNA | -1.057600267 | 1.04E-10 |
| 20292     | Ccl11'    | mRNA | -1.055495113 | 1.31E-10 |
| 54525     | Syt7'     | mRNA | -1.054447784 | 1.33E-10 |
| 170706    | Tmem37'   | mRNA | -1.054447784 | 1.65E-10 |
| 11459     | Acta1'    | mRNA | -1.052396836 | 2.00E-10 |
| 20556     | Slfn2'    | mRNA | -1.050561547 | 2.08E-10 |
| 210719    | Mkx'      | mRNA | -1.049468676 | 2.55E-10 |
| 14675     | Gna14'    | mRNA | -1.048738655 | 2.70E-10 |
| 70967     | Eva1c'    | mRNA | -1.045514659 | 4.17E-10 |
| 333564    | Fndc3c1'  | mRNA | -1.042310805 | 4.32E-10 |
| 320865    | Cdh18'    | mRNA | -1.03932313  | 4.64E-10 |
| 170677    | Cdhr1'    | mRNA | -1.038243835 | 5.01E-10 |
| 74199     | Vit'      | mRNA | -1.037474705 | 5.37E-10 |
| 94227     | Pi15'     | mRNA | -1.036525876 | 7.01E-10 |
| 225608    | Sh3tc2'   | mRNA | -1.034036324 | 9.33E-10 |
| 243659    | Styk1'    | mRNA | -1.033964898 | 9.61E-10 |
| 16416     | Itgb3'    | mRNA | -1.029747343 | 9.63E-10 |
| 19049     | Ppp1r1b'  | mRNA | -1.029210817 | 1.26E-09 |



|           |           |      |              |          |
|-----------|-----------|------|--------------|----------|
| 233781    | Xylt1'    | mRNA | -1.028569152 | 1.65E-09 |
| 241494    | Zfp385b'  | mRNA | -1.026472211 | 1.98E-09 |
| 71145     | Scara5'   | mRNA | -1.025928465 | 2.11E-09 |
| 118449    | Synpo2'   | mRNA | -1.024662054 | 4.83E-09 |
| 13592     | Ebf2'     | mRNA | -1.021061616 | 5.29E-09 |
| 237523    | Ptprq'    | mRNA | -1.018650057 | 5.99E-09 |
| 330406    | B4galnt3' | mRNA | -1.015266757 | 6.08E-09 |
| 12182     | Bst1'     | mRNA | -1.013674937 | 7.00E-09 |
| 20503     | Slc16a7'  | mRNA | -1.01199155  | 7.37E-09 |
| 214112    | Nipal4'   | mRNA | -1.003598643 | 8.70E-09 |
| 18417     | Cldn11'   | mRNA | -1.002601795 | 9.21E-09 |
| 218215    | Rnf144b'  | mRNA | -1           | 1.10E-08 |
| 14176     | 'Fgf5'    | mRNA | 1            | 1.11E-08 |
| 17342     | 'Mitf'    | mRNA | 1            | 1.15E-08 |
| 69908     | 'Rab3b'   | mRNA | 1.004898799  | 1.40E-08 |
| 57738     | 'Slc15a2' | mRNA | 1.008988783  | 1.42E-08 |
| 67874     | 'Rprm'    | mRNA | 1.009715155  | 1.47E-08 |
| 110557    | 'H2-Q6'   | mRNA | 1.012600037  | 1.57E-08 |
| 242939    | 'Cpz'     | mRNA | 1.016119665  | 1.90E-08 |
| 50759     | 'Fbxo16'  | mRNA | 1.016873819  | 1.91E-08 |
| 11670     | 'Aldh3a1' | mRNA | 1.01720929   | 2.19E-08 |
| 13867     | 'ErbB3'   | mRNA | 1.021216486  | 3.32E-08 |
| 17968     | 'Ncam2'   | mRNA | 1.030422921  | 3.42E-08 |
| 99526     | 'Usp53'   | mRNA | 1.033683126  | 3.75E-08 |
| 18158     | 'Nppb'    | mRNA | 1.036174788  | 4.02E-08 |
| 224090    | 'Tmem44'  | mRNA | 1.041211117  | 4.43E-08 |
| 14017     | 'Evi2a'   | mRNA | 1.046459311  | 5.10E-08 |
| 18143     | 'Npas2'   | mRNA | 1.048661582  | 5.25E-08 |
| 16174     | 'Il18rap' | mRNA | 1.050040682  | 5.28E-08 |
| 101488143 | 'Hbb-bt'  | mRNA | 1.052974465  | 5.39E-08 |
| 12740     | 'Cldn4'   | mRNA | 1.054447784  | 5.39E-08 |
| 240753    | 'Plekha6' | mRNA | 1.060925704  | 6.22E-08 |
| 269642    | 'Nat8l'   | mRNA | 1.068838876  | 6.41E-08 |
| 66607     | 'Ms4a4d'  | mRNA | 1.068838876  | 6.56E-08 |
| 246228    | 'Vwa1'    | mRNA | 1.08246216   | 6.92E-08 |
| 16782     | 'Lamc2'   | mRNA | 1.088024748  | 7.34E-08 |
| 234673    | 'Ces2e'   | mRNA | 1.096676019  | 7.78E-08 |
| 327814    | 'Ppfia2'  | mRNA | 1.096945556  | 7.95E-08 |
| 71690     | 'Esm1'    | mRNA | 1.100868828  | 1.05E-07 |
| 74342     | 'Lrrtm1'  | mRNA | 1.104835209  | 1.07E-07 |

|           |            |      |             |          |
|-----------|------------|------|-------------|----------|
| 243743    | 'Plxna4'   | mRNA | 1.108209217 | 1.34E-07 |
| 100043381 | 'Gm14308'  | mRNA | 1.114536432 | 1.56E-07 |
| 170799    | 'Rtkn2'    | mRNA | 1.12241544  | 1.56E-07 |
| 57776     | 'Ttyh1'    | mRNA | 1.12268252  | 1.58E-07 |
| 271127    | 'Adamts16' | mRNA | 1.136866713 | 1.59E-07 |
| 81877     | 'Tnxb'     | mRNA | 1.141661149 | 2.23E-07 |
| 11630     | 'Crybg1'   | mRNA | 1.145850866 | 2.54E-07 |
| 627626    | 'Ptchd4'   | mRNA | 1.156725504 | 2.61E-07 |
| 14462     | 'Gata3'    | mRNA | 1.158989524 | 2.86E-07 |
| 269295    | 'Rtn4rl2'  | mRNA | 1.160776325 | 2.98E-07 |
| 17395     | 'Mmp9'     | mRNA | 1.162271429 | 2.98E-07 |
| 18772     | 'Pkp1'     | mRNA | 1.182591413 | 3.08E-07 |
| 11302     | 'Aatk'     | mRNA | 1.185555653 | 3.31E-07 |
| 20776     | 'Tmie'     | mRNA | 1.187725289 | 3.34E-07 |
| 15371     | 'Hmx1'     | mRNA | 1.190331212 | 4.19E-07 |
| 14579     | 'Gem'      | mRNA | 1.200593831 | 4.89E-07 |
| 12323     | 'Camk2b'   | mRNA | 1.201633861 | 4.89E-07 |
| 20128     | 'Trim30a'  | mRNA | 1.215142682 | 5.06E-07 |
| 76487     | 'Ppp1r3g'  | mRNA | 1.217962897 | 5.09E-07 |
| 245020    | 'Slc35g2'  | mRNA | 1.222392421 | 6.31E-07 |
| 319171    | 'H2ac24'   | mRNA | 1.228203261 | 7.20E-07 |
| 73167     | 'Arhgap8'  | mRNA | 1.240051088 | 7.26E-07 |
| 15410     | 'Hoxb3'    | mRNA | 1.242856524 | 7.66E-07 |
| 68553     | 'Col6a4'   | mRNA | 1.270701259 | 8.87E-07 |
| 434341    | 'Nlrc5'    | mRNA | 1.284177324 | 9.13E-07 |
| 71889     | 'Epn3'     | mRNA | 1.289891343 | 9.38E-07 |
| 12404     | 'Cbln1'    | mRNA | 1.291933355 | 9.56E-07 |
| 320840    | 'Negr1'    | mRNA | 1.29225274  | 9.59E-07 |
| 16494     | 'Kcna6'    | mRNA | 1.300910037 | 1.05E-06 |
| 54448     | 'Il1f6'    | mRNA | 1.311944006 | 1.09E-06 |
| 15077     | 'H3c14'    | mRNA | 1.328836464 | 1.09E-06 |
| 17286     | 'Meox2'    | mRNA | 1.336716591 | 1.11E-06 |
| 229898    | 'Gbp5'     | mRNA | 1.33848275  | 1.32E-06 |
| 54140     | 'Avpr1a'   | mRNA | 1.356338126 | 1.53E-06 |
| 232035    | 'Ccser1'   | mRNA | 1.370223652 | 1.72E-06 |
| 70638     | 'Fam189a1' | mRNA | 1.381870635 | 1.74E-06 |
| 16858     | 'Lgals7'   | mRNA | 1.38310701  | 1.77E-06 |
| 22422     | 'Wnt7b'    | mRNA | 1.391128356 | 2.09E-06 |
| 115490184 | 'Gm42427'  | mRNA | 1.393481356 | 2.11E-06 |
| 80797     | 'Clca3a2'  | mRNA | 1.394859617 | 2.28E-06 |

|           |                 |      |             |          |
|-----------|-----------------|------|-------------|----------|
| 11567     | 'Avil'          | mRNA | 1.395009019 | 2.43E-06 |
| 73121     | 'Rflna'         | mRNA | 1.396517411 | 2.69E-06 |
| 23859     | 'Dlg2'          | mRNA | 1.398549376 | 2.94E-06 |
| 12061     | 'Bdkrb1'        | mRNA | 1.406940032 | 3.00E-06 |
| 78921     | '9130019O22Rik' | mRNA | 1.408250015 | 3.38E-06 |
| 19017     | 'Ppargc1a'      | mRNA | 1.411015811 | 3.50E-06 |
| 15412     | 'Hoxb4'         | mRNA | 1.422233001 | 3.58E-06 |
| 12224     | 'Klf5'          | mRNA | 1.429880836 | 3.69E-06 |
| 22774     | 'Zic4'          | mRNA | 1.449610648 | 3.71E-06 |
| 208098    | 'Panx3'         | mRNA | 1.459112474 | 4.11E-06 |
| 58237     | 'Nkain4'        | mRNA | 1.461843481 | 4.45E-06 |
| 231440    | 'Parm1'         | mRNA | 1.465663572 | 4.56E-06 |
| 433022    | 'Plcx2'         | mRNA | 1.478653599 | 4.63E-06 |
| 66042     | 'Sostdc1'       | mRNA | 1.505109193 | 4.81E-06 |
| 207742    | 'Rnf43'         | mRNA | 1.510961919 | 4.95E-06 |
| 24084     | 'Tek2'          | mRNA | 1.514101627 | 5.37E-06 |
| 56089     | 'Ramp3'         | mRNA | 1.518928017 | 5.39E-06 |
| 12349     | 'Car2'          | mRNA | 1.526545814 | 5.89E-06 |
| 106952    | 'Arap3'         | mRNA | 1.528100164 | 6.30E-06 |
| 59058     | 'Bhlhe22'       | mRNA | 1.528198681 | 6.48E-06 |
| 213522    | 'Plekhg6'       | mRNA | 1.559342382 | 6.69E-06 |
| 16875     | 'Lhx8'          | mRNA | 1.567040593 | 7.20E-06 |
| 16196     | 'Il7'           | mRNA | 1.568842835 | 7.20E-06 |
| 17311     | 'Kitl'          | mRNA | 1.572989859 | 7.39E-06 |
| 76469     | 'Cmya5'         | mRNA | 1.584962501 | 7.72E-06 |
| 11847     | 'Arg2'          | mRNA | 1.584962501 | 7.72E-06 |
| 271424    | 'Ip6k3'         | mRNA | 1.598078001 | 7.72E-06 |
| 11307     | 'Abcg1'         | mRNA | 1.605100146 | 8.39E-06 |
| 24131     | 'Ldb3'          | mRNA | 1.610053482 | 8.83E-06 |
| 15245     | 'Hhip'          | mRNA | 1.616821415 | 9.85E-06 |
| 78748     | 'Rassf10'       | mRNA | 1.662071426 | 1.02E-05 |
| 17231     | 'Mcpt8'         | mRNA | 1.674599713 | 1.10E-05 |
| 115489690 | 'Gm52606'       | mRNA | 1.691755891 | 1.11E-05 |
| 16538     | 'Kcns1'         | mRNA | 1.726981506 | 1.14E-05 |
| 14960     | 'H2-Aa'         | mRNA | 1.732171445 | 1.23E-05 |
| 230822    | 'Ncmap'         | mRNA | 1.734619575 | 1.34E-05 |
| 270097    | 'Vat1l'         | mRNA | 1.736965594 | 1.51E-05 |
| 57329     | 'Otor'          | mRNA | 1.776731504 | 1.57E-05 |
| 226695    | 'Ifi205'        | mRNA | 1.777607579 | 1.68E-05 |
| 16456     | 'F11r'          | mRNA | 1.777844222 | 1.79E-05 |

|           |                 |      |             |          |
|-----------|-----------------|------|-------------|----------|
| 21682     | 'Tec'           | mRNA | 1.786596362 | 1.81E-05 |
| 59095     | 'Fxyd6'         | mRNA | 1.789320999 | 1.81E-05 |
| 231162    | 'Cyt11'         | mRNA | 1.807354922 | 1.98E-05 |
| 108167434 | 'Gm45988'       | mRNA | 1.819427754 | 2.02E-05 |
| 93735     | 'Wnt16'         | mRNA | 1.821662759 | 2.06E-05 |
| 241226    | 'Itga8'         | mRNA | 1.831877241 | 2.19E-05 |
| 239650    | 'Ccdc184'       | mRNA | 1.833375167 | 2.34E-05 |
| 140795    | 'P2ry14'        | mRNA | 1.84502534  | 2.58E-05 |
| 12801     | 'Cnr1'          | mRNA | 1.857980995 | 2.62E-05 |
| 69253     | 'Hspb2'         | mRNA | 1.888919532 | 2.89E-05 |
| 97998     | 'Deptor'        | mRNA | 1.900239988 | 2.94E-05 |
| 93842     | 'Igsf9'         | mRNA | 1.905997512 | 3.05E-05 |
| 20358     | 'Sema6a'        | mRNA | 1.906890596 | 3.10E-05 |
| 115489125 | 'Gm52435'       | mRNA | 1.91346325  | 3.30E-05 |
| 16409     | 'Itgam'         | mRNA | 1.921997488 | 3.44E-05 |
| 16572     | 'Kif5a'         | mRNA | 1.94116897  | 3.72E-05 |
| 14190     | 'Fgl2'          | mRNA | 1.967938791 | 4.12E-05 |
| 622434    | 'Arhgef26'      | mRNA | 1.986060809 | 4.83E-05 |
| 12518     | 'Cd79a'         | mRNA | 1.99794926  | 5.08E-05 |
| 230726    | 'Rhbd12'        | mRNA | 2           | 5.08E-05 |
| 68027     | 'Tmem178'       | mRNA | 2.016258585 | 6.14E-05 |
| 83453     | 'Chrd11'        | mRNA | 2.018378529 | 6.47E-05 |
| 214305    | 'Hhip11'        | mRNA | 2.026152288 | 7.20E-05 |
| 74306     | 'Prss46'        | mRNA | 2.030847588 | 8.09E-05 |
| 68339     | 'Ccdc88c'       | mRNA | 2.041820176 | 8.48E-05 |
| 56811     | 'Dkk2'          | mRNA | 2.041982449 | 8.62E-05 |
| 14941     | 'Gzmd'          | mRNA | 2.042644337 | 8.87E-05 |
| 18812     | 'Pri2c3'        | mRNA | 2.053111336 | 9.99E-05 |
| 20284     | 'Scrg1'         | mRNA | 2.0669787   | 1.04E-04 |
| 12391     | 'Cav3'          | mRNA | 2.079019999 | 1.06E-04 |
| 12737     | 'Cldn1'         | mRNA | 2.120294234 | 1.23E-04 |
| 59308     | 'Emcn'          | mRNA | 2.186998515 | 1.23E-04 |
| 268595    | 'D430019H16Rik' | mRNA | 2.192223669 | 1.27E-04 |
| 74175     | 'Crct1'         | mRNA | 2.192645078 | 1.27E-04 |
| 12156     | 'Bmp2'          | mRNA | 2.222392421 | 1.29E-04 |
| 72027     | 'Slc39a4'       | mRNA | 2.286522759 | 1.29E-04 |
| 236573    | 'Gbp9'          | mRNA | 2.28757659  | 1.29E-04 |
| 319387    | 'Adgr13'        | mRNA | 2.337409082 | 1.32E-04 |
| 234857    | 'Spire2'        | mRNA | 2.338662111 | 1.45E-04 |
| 58916     | 'Myot'          | mRNA | 2.347923303 | 1.61E-04 |

|           |                 |      |             |          |
|-----------|-----------------|------|-------------|----------|
| 74901     | 'Kbtbd11'       | mRNA | 2.350497247 | 1.66E-04 |
| 20269     | 'Scn3a'         | mRNA | 2.407847121 | 1.68E-04 |
| 54418     | 'Fmn2'          | mRNA | 2.422847328 | 1.78E-04 |
| 21789     | 'Tfpi2'         | mRNA | 2.43718554  | 1.79E-04 |
| 319772    | 'C130050O18Rik' | mRNA | 2.45169597  | 1.82E-04 |
| 53374     | 'Chst3'         | mRNA | 2.459431619 | 1.82E-04 |
| 22271     | 'Upp1'          | mRNA | 2.472068444 | 1.83E-04 |
| 13052     | 'Cxadr'         | mRNA | 2.523561956 | 1.86E-04 |
| 12739     | 'Cldn3'         | mRNA | 2.5360529   | 1.89E-04 |
| 50765     | 'Tfr2'          | mRNA | 2.563136138 | 1.94E-04 |
| 67425     | 'Eps8l1'        | mRNA | 2.576599028 | 2.05E-04 |
| 14465     | 'Gata6'         | mRNA | 2.584962501 | 2.13E-04 |
| 16644     | 'Kng1'          | mRNA | 2.624490865 | 2.14E-04 |
| 13118     | 'Cyp4a12b'      | mRNA | 2.64625868  | 2.19E-04 |
| 54710     | 'Hs3st3b1'      | mRNA | 2.652076697 | 2.20E-04 |
| 171209    | 'Asic3'         | mRNA | 2.724892762 | 2.24E-04 |
| 18132     | 'Notch4'        | mRNA | 2.73039294  | 2.41E-04 |
| 232441    | 'Rerg'          | mRNA | 2.746243408 | 2.51E-04 |
| 231655    | 'Oasl1'         | mRNA | 2.836050355 | 2.51E-04 |
| 192167    | 'Nlgn1'         | mRNA | 2.84556608  | 2.56E-04 |
| 235106    | 'Ntm'           | mRNA | 2.867452284 | 2.56E-04 |
| 14867     | 'Gstm6'         | mRNA | 2.906890596 | 2.95E-04 |
| 20259     | 'Scin'          | mRNA | 2.924759016 | 2.99E-04 |
| 622645    | 'Tmem200c'      | mRNA | 3           | 3.06E-04 |
| 192663    | 'Abcg4'         | mRNA | 3.106422059 | 3.10E-04 |
| 241035    | 'Pkh1'          | mRNA | 3.169925001 | 3.59E-04 |
| 380713    | 'Scarf1'        | mRNA | 3.169925001 | 3.62E-04 |
| 634882    | 'Itih5l-ps'     | mRNA | 3.247927513 | 3.62E-04 |
| 109979    | 'Art3'          | mRNA | 3.274584514 | 3.62E-04 |
| 12167     | 'Bmpr1b'        | mRNA | 3.303055362 | 3.66E-04 |
| 233020    | 'Hipk4'         | mRNA | 3.350497247 | 3.80E-04 |
| 232714    | 'Mgam'          | mRNA | 3.356338126 | 3.84E-04 |
| 100039210 | 'Gm2102'        | mRNA | 3.374518922 | 3.84E-04 |
| 213573    | 'Cracr2b'       | mRNA | 3.375039431 | 3.85E-04 |
| 13024     | 'Ctla2a'        | mRNA | 3.419538892 | 3.96E-04 |
| 228413    | 'Prrg4'         | mRNA | 3.652076697 | 4.04E-04 |
| 407800    | 'Ecm2'          | mRNA | 3.709658248 | 4.14E-04 |
| 18509     | 'Pax7'          | mRNA | 3.733354341 | 4.39E-04 |
| 66610     | 'Abi3'          | mRNA | 3.781359714 | 4.39E-04 |
| 15402     | 'Hoxa5'         | mRNA | 3.805010982 | 4.52E-04 |

|           |                 |      |             |          |
|-----------|-----------------|------|-------------|----------|
| 14160     | 'Lgr5'          | mRNA | 3.955389113 | 4.68E-04 |
| 23880     | 'Fyb'           | mRNA | 3.977279923 | 4.73E-04 |
| 100043920 | 'Fam205a4'      | mRNA | 3.994353437 | 5.79E-04 |
| 74134     | 'Cyp2s1'        | mRNA | 4           | 5.89E-04 |
| 233744    | 'Spon1'         | mRNA | 4           | 6.17E-04 |
| 50795     | 'Sh3bgr'        | mRNA | 4.075288127 | 6.21E-04 |
| 76088     | 'Dock8'         | mRNA | 4.115477217 | 6.28E-04 |
| 15375     | 'Foxa1'         | mRNA | 4.254565992 | 6.53E-04 |
| 330119    | 'Adamts3'       | mRNA | 4.310528633 | 6.55E-04 |
| 107146    | 'Glyat'         | mRNA | 4.311748315 | 6.71E-04 |
| 12971     | 'Crym'          | mRNA | 4.509013647 | 6.73E-04 |
| 554327    | '2610042L04Rik' | mRNA | 4.526286593 | 6.78E-04 |
| 15446     | 'Hpgd'          | mRNA | 4.906890596 | 6.78E-04 |
| 102640594 | 'Gm28710'       | mRNA | 5.077637411 | 7.94E-04 |
| 16511     | 'Kcnh2'         | mRNA | 5.106199404 | 7.99E-04 |
| 56222     | 'Cited4'        | mRNA | 5.426264755 | 8.27E-04 |
| 64706     | 'Scube1'        | mRNA | 5.523561956 | 8.32E-04 |
| 72125     | 'Amer2'         | mRNA | 5.608809243 | 8.71E-04 |
| 236576    | 'Spry3'         | mRNA | 5.844095469 | 8.74E-04 |
| 15478     | 'Hs3st3a1'      | mRNA | 5.857980995 | 9.33E-04 |
| 353169    | 'Slc2a12'       | mRNA | 6.285402219 | 9.36E-04 |
| 260315    | 'Nav3'          | mRNA | 7.22881869  | 9.39E-04 |
| 18190     | 'Nrxn2'         | mRNA | 8.018200179 | 9.78E-04 |
| 58185     | 'Rsad2'         | mRNA | 9.041659152 | 9.86E-04 |
